# Supplementary material for: Identification of a novel four-lncRNA signature as a prognostic indicator in cirrhotic hepatocellular carcinoma
Source: PeerJ. 2019 Aug 1;7:e7413. doi: 10.7717/peerj.7413 (PMC6679908; doi:10.7717/peerj.7413)
Supplement: Table S1 [file peerj-07-7413-s001.xlsx]

## Sheet: Sheet1
id	LINC01587	AC016026.1	IGF2-AS	PINK1-AS	KIAA0087	DKFZP434K028	FAM182A	C22orf24	TTTY1B	H19	TTTY9B	AL139352.1	C7orf69	AL355922.1	LINC01558	PART1	ZFHX2-AS1	AC008080.1	TMEM51-AS1	FAM182B	DLEU1	AC008969.1	TTTY14	AP003471.1	LINC00652	AC004832.1	TP53TG1	LINC00334	PRKCZ-AS1	WT1-AS	AC131971.1	DSCR4	AP001062.1	AC132216.1	MIR22HG	C2orf27B	LINC00846	TCL6	GARS-DT	PDXDC2P-NPIPB14P	SNHG17	AC068631.1	AP000550.1	AL157838.1	AFDN-DT	NBR2	LINC01565	AC105020.1	ADD3-AS1
GSM362959	3.98293	5.28344	3.82715	7.07307	3.33569	4.18695	3.66082	3.65831	3.2975	4.32364	3.40906	3.94474	4.15379	3.5759	3.39097	3.73168	4.82716	3.88243	3.84323	3.5176	5.9739	6.22113	5.71862	3.24826	4.63821	4.49148	5.37389	5.68445	3.63318	4.1568	3.64926	3.98394	4.08511	4.76585	5.43721	3.84625	3.39399	3.40856	4.79399	4.05128	3.91158	6.30087	3.64223	3.82012	3.5769	3.76685	3.79298	4.20907	3.50052
GSM362960	3.8063	5.38681	3.76704	7.25992	3.56268	4.78682	3.85814	3.70664	3.30597	4.1969	3.30094	4.14354	4.68917	3.45798	4.17576	3.72476	4.83145	3.62308	3.81133	3.52443	6.29484	6.01498	4.33683	3.47611	5.11299	4.33985	6.0633	5.70995	3.44792	3.78717	3.94925	4.39723	4.02509	4.51098	6.11766	4.36099	3.13584	3.61478	5.25292	4.09119	3.79523	6.5841	3.99757	3.83247	4.14052	3.74389	4.17274	3.85663	3.78415
GSM362964	3.44285	4.75909	3.93569	7.85435	3.23249	4.2933	3.72984	3.6492	3.31263	4.04888	3.2946	4.23019	4.22618	3.62316	3.81548	3.83502	4.7888	3.75037	3.37974	3.7073	5.89001	6.67334	5.34909	3.47891	4.77712	5.07562	6.05529	5.24692	3.77341	3.78944	3.99479	3.68727	3.87091	4.26525	6.01823	4.16508	3.46689	3.39302	4.44956	4.32034	3.7684	7.96654	3.64569	3.42582	3.4739	3.74536	3.99779	4.12801	3.4744
GSM362966	3.50481	5.59071	3.71555	7.41166	3.42808	3.68588	3.86337	3.76874	3.4199	4.01324	3.26952	3.57028	4.09201	3.69713	4.14725	3.61887	4.99464	3.93242	3.59381	3.4066	6.17894	6.38865	6.05413	3.78102	4.74571	4.81528	7.97431	4.95645	3.78613	4.1493	3.91196	3.86286	3.91571	4.12168	6.66589	3.92219	3.37796	3.52194	4.78152	4.72423	3.77386	7.48361	3.9401	3.58869	4.09406	3.79841	3.81376	3.97539	3.69713
GSM362976	3.42926	5.4782	3.47738	8.44468	3.35308	3.78612	3.72648	3.61571	3.51246	4.17105	3.45131	3.87433	4.22017	3.49141	4.19511	3.50143	4.99737	3.76307	3.55356	3.57361	6.50266	6.28715	5.8952	3.58664	4.3605	4.14799	6.4746	4.97398	3.37613	3.64378	3.75805	3.61772	3.96422	3.77008	6.56582	4.12293	3.08343	3.34431	4.60209	5.55538	3.69891	8.08681	3.55557	3.44129	3.4473	3.78011	4.01868	3.85729	3.38365
GSM362977	3.49579	6.71811	3.75016	7.55159	3.45658	4.2046	3.83461	4.02564	3.32588	4.0749	3.20724	4.03469	4.51125	3.62851	3.76222	4.10456	4.56018	3.60639	4.2227	3.62851	6.20837	6.27875	5.91681	3.54305	5.1155	5.62423	5.82129	4.88224	4.47606	4.42177	3.49177	4.10607	4.12585	4.95564	4.71233	4.34335	3.69386	3.81576	4.9848	4.94559	3.65163	8.53086	3.82506	3.80244	3.89795	3.92409	4.87219	4.45595	3.52394
GSM362982	3.30047	4.79736	3.51813	7.54578	3.41128	3.5953	3.53841	3.22429	3.34994	4.34523	3.22232	3.73282	3.93663	3.27574	3.58442	3.43453	4.71393	4.01479	3.53594	3.44591	6.71967	6.07461	4.58267	3.47064	3.83967	4.09196	6.57226	4.44812	3.50032	3.5211	3.28465	3.89013	3.81593	3.87034	6.30217	3.9485	3.28465	3.29676	5.42956	4.39074	4.15923	6.37703	3.58838	3.41722	3.82978	4.04842	3.88815	3.57255	3.50824
GSM362983	3.42332	4.98626	3.63309	7.49531	3.10324	4.01718	3.58581	3.46369	3.21551	4.16786	3.05695	3.41642	4.10975	3.15051	4.04968	3.41445	5.54434	3.69021	3.5671	3.28839	6.34535	5.75641	3.78377	3.15839	3.62324	5.10937	5.01679	4.53126	3.63604	3.75521	3.57695	3.62915	3.78344	4.36384	6.00754	4.09399	3.2746	3.37924	4.53225	4.14914	7.77337	8.00645	3.63998	3.2815	4.85232	3.69218	3.86945	3.87142	3.47748
GSM362986	3.36669	5.59618	3.47309	7.1401	3.22125	3.8284	3.40183	3.39988	3.29738	3.77374	3.07483	3.33253	3.96506	3.04359	4.10758	3.29592	4.99358	3.69272	3.64782	2.95671	5.4195	6.00714	5.849	3.08556	3.60194	4.2374	5.84119	5.07493	3.58144	3.69467	3.64294	3.51604	3.64749	3.42819	6.46689	3.82254	3.00747	3.13974	4.67959	4.07146	5.28089	7.05127	3.48529	3.12168	4.26278	3.74836	3.51213	3.87623	3.31154
GSM362992	3.34359	5.75244	3.60484	8.24474	3.36842	3.7449	3.57454	3.51544	3.55021	4.2217	3.3277	3.6853	4.11939	3.29094	4.06178	3.30286	4.72136	3.91774	3.69623	3.51345	6.20243	6.5203	5.3114	3.35352	3.93066	4.68162	6.04846	4.71738	3.63961	3.81245	3.42405	4.07966	3.81013	4.15614	6.37527	3.84423	3.54325	3.37637	5.15644	3.92668	4.83758	7.91396	3.46825	3.51246	4.05085	4.00416	4.13826	3.85119	3.57405
GSM363009	3.38744	4.37465	3.36033	7.38649	3.8946	4.03621	3.39698	4.56647	3.59432	3.5652	3.36434	4.36159	4.17178	3.57323	4.58555	3.22023	4.76799	3.54511	3.61742	3.22876	5.36989	5.92426	5.27248	3.71383	4.42687	4.81252	5.08869	5.64406	3.36434	3.10323	4.61166	4.42185	3.83769	3.89862	6.38321	3.94683	2.96062	3.35003	4.73519	3.62345	3.79016	6.8656	3.39447	3.63349	3.57022	4.20794	3.57424	3.53407	3.41004
GSM363010	3.88787	4.12778	4.51329	6.87348	4.71014	3.73612	3.99552	4.75525	3.95964	3.78431	4.27132	5.01875	4.51431	3.4798	5.52421	3.52492	4.59189	4.09907	3.79867	3.82737	5.46065	5.556	5.35402	3.9135	4.57788	4.95108	5.27815	4.76141	3.70844	3.04919	5.19202	4.76141	3.70639	4.096	6.59563	4.08369	3.57208	3.71434	4.8424	3.92785	3.66846	6.61546	3.58848	4.78704	3.01023	3.9176	4.02935	3.92888	3.52287
GSM363011	2.95463	4.76349	3.26765	7.23739	3.28423	3.49875	3.57823	3.3008	3.29593	3.14381	3.02289	3.2696	3.65868	3.09895	4.19207	3.11407	5.39082	3.23059	3.27155	3.37101	5.24228	5.48606	3.93269	3.19159	3.56506	4.2028	7.09405	5.33882	3.37686	3.05215	3.20037	3.646	3.46853	3.58164	6.43486	3.70938	3.33201	3.1577	4.7791	3.98827	4.14819	5.43698	3.49827	3.21792	3.20427	3.79129	3.62162	3.38564	3.21109
GSM363012	3.43576	5.13584	3.56294	8.07885	3.6189	4.0574	3.57515	4.07978	3.44899	4.41247	3.68096	4.50302	4.42468	3.82441	4.4552	3.58125	4.63494	3.67078	3.44085	3.92107	6.54596	6.1156	6.1095	3.45916	4.19983	4.85707	7.26832	4.85606	4.13268	3.73692	4.40026	4.18559	3.91869	3.87121	6.42489	4.0808	3.59651	3.76744	5.00765	4.08894	6.02607	7.66307	3.48714	3.46832	3.78982	3.79389	4.21916	3.83153	3.60313
GSM363013	3.2681	5.32547	3.61067	7.09802	3.29942	3.72617	3.39926	3.54314	3.12227	3.86319	3.23482	3.6645	3.8074	3.39632	4.241	3.06305	4.97279	3.54803	3.17023	3.47658	5.89218	6.49901	4.49352	4.00316	3.70659	4.64816	6.29053	5.09448	3.55488	3.14576	3.70855	3.28474	3.80871	3.26027	6.18581	3.57446	3.18491	3.33662	4.34475	4.31343	4.15389	6.1509	3.60725	3.71638	3.53922	3.91017	3.56369	3.73693	3.20253
GSM363014	3.34762	6.58933	3.54658	7.14298	3.01801	3.97122	3.21597	3.66734	3.61983	3.94845	3.17143	3.40899	3.68813	3.40206	4.22561	3.09323	4.88253	3.40404	3.22686	3.51985	5.1412	6.6804	3.50699	3.68318	3.45353	4.45624	5.80736	4.99075	3.30704	3.23082	3.47333	3.73564	3.62379	3.46343	6.81205	3.67526	3.32486	3.35084	4.38101	4.41466	3.64853	7.81739	3.39217	3.41592	4.56611	3.35455	3.54856	3.53866	3.1843
GSM363029	3.38438	4.58548	3.62675	7.61054	3.1381	3.64923	3.36093	3.80266	3.26222	3.81928	3.20944	3.93558	3.76748	3.39024	4.68028	3.17866	4.96728	3.27688	3.4782	3.79582	5.98301	6.32311	4.35679	3.39806	3.60427	3.96001	6.78244	5.50316	3.77725	3.08337	3.616	3.49286	3.40881	3.4049	7.7959	3.67464	3.27395	3.35237	4.32161	4.09292	4.29815	6.7945	3.53782	3.53391	3.25733	3.91799	3.50947	3.63359	3.19869
GSM363035	3.63163	4.43101	4.16934	8.41188	3.71372	3.79273	3.66549	4.18268	3.72398	4.21039	4.02465	3.87483	4.26067	3.54235	5.53415	3.37046	4.68687	4.53774	3.83481	3.88714	5.20885	6.72964	5.85432	4.84867	4.78607	5.0344	7.65114	5.13394	3.61521	3.49001	4.38278	4.14676	4.07254	4.91639	7.40486	4.09751	3.61315	3.61649	4.5911	3.39766	4.01952	8.25796	3.68396	3.82249	3.50028	4.01952	4.62188	4.43717	3.54337
GSM363036	2.92367	3.98554	3.57805	7.21265	3.52085	3.47568	3.45561	3.94339	3.35825	3.89521	3.27696	3.99156	4.59778	3.49977	4.66803	3.27093	4.97348	3.88718	3.21573	4.00361	5.32543	6.6061	4.81256	3.88819	3.71556	4.67807	5.93064	5.27525	3.72158	3.22276	3.85607	3.837	3.82997	3.33517	6.04506	3.44758	3.96045	3.53465	4.61584	4.0297	4.01866	7.86503	3.42148	3.75871	4.03171	4.83966	4.04877	4.15516	3.3974
GSM363037	3.53524	5.06302	3.61385	7.786	3.1795	4.02099	3.63098	3.634	3.16741	3.79726	3.35385	3.54129	4.0099	3.54834	4.30014	3.26617	4.39185	3.50098	3.32059	3.74687	6.17962	7.6298	3.89502	4.10866	3.74385	4.34952	7.656	4.4644	3.52214	3.20772	3.64307	3.98269	3.57522	3.64106	6.78731	3.78819	3.49292	3.72748	5.16077	3.99378	4.20238	7.44202	3.26214	3.40625	3.17245	3.61083	3.89905	3.64207	3.45311
GSM363038	3.33759	4.46722	3.61824	6.87636	3.50357	3.74599	3.60868	3.7983	3.2883	3.96025	3.39593	3.92806	4.02462	3.62427	5.6562	3.34111	4.64057	3.62528	3.45528	3.77918	7.46884	6.4911	5.51236	3.70877	3.71581	5.61194	6.46696	4.24995	3.6122	3.41203	3.46232	3.53877	3.43852	3.37682	6.65607	3.59812	3.06901	3.4676	4.75692	4.16545	4.36864	7.59659	3.2375	3.44824	3.30037	4.51349	3.8335	3.85966	3.43919
GSM363049	3.22597	4.50062	3.63757	7.84585	3.30969	4.13786	3.55784	3.26584	3.43625	3.9794	3.24989	3.97043	3.8339	3.4223	4.23552	3.18312	4.66406	3.55086	3.32065	3.48708	5.57594	6.10613	3.96943	3.91861	3.81496	5.34473	6.04334	4.74478	3.67444	3.30869	3.56083	3.67743	3.51897	3.11934	7.90797	3.218	3.41931	3.47861	4.25246	4.43982	4.45378	7.01668	3.31666	3.19309	3.49804	3.95947	3.64454	3.56282	3.55884
GSM363050	3.57319	5.63105	3.66162	6.82012	3.30987	4.35023	3.39731	4.11374	3.89613	4.39991	3.60598	4.42872	3.86234	3.54437	4.2439	3.17125	5.0587	3.82856	3.16579	3.759	5.31904	6.80257	5.07858	3.36949	3.47581	5.23955	4.88283	5.71054	3.55033	3.13498	3.92892	3.5235	3.72488	3.40228	5.97088	3.82756	3.87625	3.53742	4.856	5.10938	5.6231	5.99241	3.49171	3.5712	4.92853	3.92792	3.98158	4.21211	3.45892
GSM363051	3.84281	4.47511	4.15998	6.93908	3.98762	4.41902	4.53376	4.69336	4.74334	4.38129	4.26197	4.82186	3.78161	4.13754	5.58981	4.47358	4.281	4.39863	4.25993	4.79841	5.23898	6.13849	4.36803	5.72137	4.54446	5.19309	5.72647	6.16909	4.01516	3.5756	4.83104	4.726	3.9006	3.2207	6.02223	3.70105	3.36653	4.27726	4.69744	3.61538	3.6164	5.60409	3.78008	4.57098	4.24055	4.48327	4.14468	4.37721	3.89686
GSM363054	3.49652	4.66203	3.88569	8.56611	3.38017	3.91077	3.40274	3.64597	3.34507	3.63895	3.16151	4.01709	3.75129	3.50053	3.61187	3.50154	5.19296	3.40324	4.1214	3.67907	7.1114	6.13346	4.04618	3.30194	4.03113	4.16152	5.31499	5.10336	3.35008	3.26984	4.10636	3.64998	3.74895	3.71117	9.19266	4.23876	3.11337	3.39246	5.24378	3.57075	3.6209	3.77235	3.37415	3.23774	2.90675	3.77436	4.02612	4.01508	3.61939
GSM363071	3.55844	5.99977	3.7516	7.75974	3.16019	4.27332	3.61022	3.72173	3.51364	4.09908	3.07755	3.81233	3.97562	3.72571	3.9806	3.27269	4.70941	3.44394	3.34239	3.59429	5.49797	6.83412	4.48937	3.59429	3.83125	4.96529	6.78235	5.01408	3.23685	3.44394	3.12832	3.9109	3.66066	3.7526	6.48764	4.30717	3.42204	3.33617	4.89659	4.67058	4.12696	7.50917	3.52609	3.3633	2.97599	3.93281	3.661	3.7058	3.36877
GSM363075	3.31875	4.52449	3.22713	7.82386	3.30791	4.0615	3.41331	3.4271	3.41134	3.75317	3.33352	3.58472	3.67239	3.46454	4.27132	3.09759	4.57505	3.37489	3.43006	3.63693	5.679	6.56459	4.56192	3.37391	3.80735	4.91359	6.42274	5.05939	3.57487	3.05376	3.64185	3.46355	3.55911	3.69702	7.39403	3.64678	3.30495	3.28304	4.47523	3.6852	4.1669	7.42556	3.47094	3.30003	3.74332	3.65761	4.03096	3.56403	3.34928
GSM363077	3.53071	4.73852	3.84022	6.76433	3.3583	3.87551	3.38653	3.65975	3.32604	4.02371	3.38149	4.01061	4.46732	3.41678	5.82536	3.63354	4.79498	3.75452	3.25849	3.54381	6.41919	7.18743	4.2183	3.49945	4.46732	4.6004	6.08144	5.58541	3.66379	2.9883	3.89567	3.42283	4.07345	3.65471	7.14307	4.0217	3.50348	3.34494	4.98856	4.48244	5.66909	6.82885	3.66328	3.69202	4.71231	4.34432	3.93398	3.87349	3.26505
GSM363078	3.43759	4.86874	3.59403	7.6937	3.60614	3.76762	3.73533	3.74845	3.62733	3.71413	2.98443	4.22382	3.8736	3.61421	3.6021	4.298	5.13687	3.28923	3.31143	3.64449	6.17777	5.94362	5.20483	3.16105	3.80799	5.75589	5.90628	4.15619	3.43254	3.57586	4.14711	3.70101	3.74441	3.63339	5.96179	3.50521	3.42346	3.43128	4.81525	4.11582	4.16629	6.12596	3.58949	3.37602	3.48805	3.93415	3.98966	3.85745	3.30336
GSM363080	3.41452	5.09471	3.89683	7.03706	3.49819	4.56713	3.23636	3.6478	3.83974	3.64288	3.23636	3.29641	4.39094	3.59465	3.84171	3.50606	5.17871	3.74328	3.99033	3.11628	4.73938	5.42937	3.83875	3.51492	3.95096	4.83978	5.14294	5.08093	3.49819	3.74721	3.41846	3.60744	3.7249	3.09659	5.30142	3.91848	3.42043	3.43937	4.9264	3.5976	3.6478	5.65018	3.68865	3.79249	3.5159	4.57402	4.19113	4.01396	3.24916
GSM363081	4.76498	5.25079	3.67437	7.37286	3.33529	4.995	3.76062	3.56035	3.25894	3.6466	3.03388	3.38288	4.70648	3.56134	3.66743	3.85977	5.0492	3.65057	4.26726	3.38188	5.09613	5.79015	4.37632	3.2401	3.61984	5.1566	4.61328	6.25019	3.6823	4.54586	3.67734	3.84886	3.75104	3.54052	5.27062	4.47051	3.89844	3.32711	4.78778	4.11953	4.03526	5.85096	4.15572	3.69519	3.93909	4.13242	3.9728	4.27024	3.54101
GSM363082	3.79336	4.67522	3.65672	8.56354	3.21632	3.6809	3.81544	3.86063	3.48855	3.80913	3.6357	4.09923	3.93841	3.99307	4.52492	3.76656	4.47937	3.67459	3.71243	3.84592	6.50201	6.16987	7.05383	4.15494	3.69246	5.32164	8.16903	4.59219	4.01094	3.38659	3.59576	4.12656	3.77795	3.89847	6.77424	4.12025	3.54005	3.72557	5.34161	4.07821	4.0267	8.69002	3.63045	3.59576	3.53585	3.66618	4.56906	3.94472	3.64674
GSM363084	3.57897	5.58615	3.8446	7.01215	3.35029	3.79167	3.46263	3.63389	3.39623	3.70779	3.22547	3.46313	4.04631	3.55201	5.37045	3.25792	4.95304	3.78169	3.48211	3.50607	6.63268	6.30215	5.24363	3.17254	3.83561	4.66145	6.27418	5.72396	3.63989	3.42019	3.66185	3.45515	3.8872	3.24045	7.56337	3.82263	3.53403	3.46114	4.73235	4.63249	4.01436	7.16793	3.55501	3.37426	3.7038	3.69481	3.71678	3.82463	3.37975
GSM363085	3.26944	5.44408	4.12515	6.2915	3.15986	4.58638	3.46818	3.34814	3.54339	3.90998	3.20469	3.4358	3.77051	3.58523	5.46102	3.3571	5.20434	3.64599	3.34714	3.51549	6.6634	5.62439	4.31343	3.36906	3.53044	4.38316	6.56777	5.12132	3.57526	3.37603	3.5922	3.50254	3.77118	3.3322	6.67635	3.85519	3.50254	3.40293	5.26378	4.97788	6.63152	6.1776	3.3581	3.49856	4.24768	3.68982	3.76254	3.79641	3.28986
GSM363087	3.15422	6.00513	3.70689	6.82345	3.53997	3.78221	3.47789	3.24888	4.11199	4.83565	4.12115	3.39646	3.54303	3.63361	3.69264	3.37763	4.88858	3.37305	3.86771	3.6102	5.55932	6.13236	3.83412	3.36898	3.58476	4.57713	7.16646	3.94099	3.74964	4.00919	4.16186	3.19188	4.2192	3.1359	5.42192	3.51046	3.58577	3.40867	4.70741	5.08095	4.63718	8.01498	3.33794	3.69875	4.16084	4.06517	3.67229	4.00715	3.87891
GSM363098	3.93742	4.61983	4.67317	6.90558	3.30333	3.9958	3.68429	3.51368	4.65103	5.95142	4.38934	3.70895	4.18603	4.26453	5.41395	3.99831	5.39718	3.48349	3.66869	4.84226	5.60519	7.15922	4.06122	4.56749	3.38183	5.04859	5.76623	3.71297	4.46281	3.34157	3.74115	3.62742	4.46583	3.69385	7.05253	3.32144	4.62989	3.99982	4.74161	3.98976	4.69531	7.01663	3.31993	3.38284	3.51872	4.78087	3.95856	4.08739	3.7477
GSM363099	3.53123	4.89643	4.56142	7.27138	3.29279	3.14591	3.64893	3.61573	4.33908	4.71031	3.54431	3.42962	4.06343	4.29784	5.19624	3.53877	4.85083	3.44571	3.45879	4.56544	4.80891	5.75057	3.80688	4.99	3.25054	5.0745	5.54936	4.72138	4.36222	3.31493	3.59561	5.19523	3.92862	3.26764	6.90149	3.39642	4.00608	4.61851	4.25759	3.59662	4.21433	6.23984	3.22287	3.20527	3.26764	4.71233	3.58354	3.56543	3.62881
GSM363102	3.1095	5.81817	3.79694	7.72415	3.30291	4.25089	3.58149	3.76588	3.50232	4.00137	3.30992	3.74383	4.08254	3.91719	3.39109	3.43869	4.7683	3.93423	3.69873	3.32395	5.74501	6.12882	5.05257	3.48729	3.59351	5.84823	6.36732	5.00146	3.52437	3.56746	3.63159	3.79193	3.75786	3.36504	7.18603	4.0645	3.52738	3.31318	5.3061	4.31703	3.91819	8.26228	3.45973	3.33397	3.55243	3.82801	3.74784	3.88813	3.37155
GSM363105	3.30326	5.06546	3.80306	7.35788	3.28045	3.84868	3.3702	3.2626	3.58985	3.82488	3.22294	3.62754	4.0609	3.4292	4.59343	3.35185	4.78879	3.82885	3.56903	3.73365	6.92584	5.954	3.49069	3.25764	3.88736	4.41393	5.24198	4.61822	3.59184	3.5016	3.64043	3.45201	3.63878	3.34987	7.63191	3.79116	3.58985	3.3878	4.8949	3.89926	4.01826	5.78641	3.40243	3.61762	4.04999	3.98751	4.10255	3.7039	3.44408
GSM363106	3.33442	5.25992	3.58495	6.48734	3.48143	3.60979	3.49126	3.61704	3.34374	3.90793	3.28991	3.68847	3.94003	3.61393	4.11394	3.43536	4.64225	3.55078	3.87791	3.47832	5.97112	5.6678	4.02698	3.43381	4.18641	4.39655	5.40485	4.88414	3.62118	3.34271	3.93588	4.23403	3.65638	3.8365	6.0177	3.67708	3.64913	3.48505	5.1388	4.58703	5.04356	7.4004	3.44571	3.69054	4.41105	3.73505	3.68743	3.92864	3.57925
GSM363107	3.2698	4.96681	3.80675	8.0426	3.26779	4.06621	3.47416	3.41706	3.30186	4.09426	3.16862	3.382	4.22449	3.43209	3.58937	3.45713	4.698	3.45813	3.56833	3.36697	6.54561	7.01143	3.86185	3.37198	4.14335	4.21948	8.11339	4.87064	3.5553	3.48618	3.67151	3.70056	3.71893	3.45112	6.73795	4.07523	3.28583	3.53302	4.65526	4.36274	4.04117	7.15135	3.63394	3.53827	3.92095	3.58736	3.93398	3.73062	3.60389
GSM363109	3.41252	5.78529	3.70578	7.88158	3.19529	4.03064	3.50188	3.61099	3.75515	4.01682	3.38882	3.86377	4.23307	3.59322	3.31674	3.414	4.45359	3.47374	3.42832	3.39573	5.32021	6.33331	5.69839	3.43918	4.01386	4.49276	5.87613	5.05756	3.59519	3.53693	3.64555	3.46683	3.86575	3.55965	6.72235	3.70875	3.56261	3.41375	4.9914	3.82822	3.9398	6.17663	3.53052	3.64753	3.73244	3.90919	3.95066	3.46189	3.64802
GSM363115	3.47192	5.72996	3.65549	6.47737	3.18177	3.56075	3.44034	3.56075	3.61601	3.97327	3.38113	3.57555	3.92491	3.41863	4.44994	3.18967	4.88714	3.71964	3.79365	3.28935	5.40329	6.04675	4.18842	3.43738	3.60318	4.53383	6.2392	5.06972	3.34067	3.23803	3.37027	3.63674	3.68707	3.27454	6.13755	3.58246	3.28343	3.32759	4.99077	4.05025	3.67523	7.8064	3.59282	3.28836	3.4512	3.99498	3.62193	3.70779	3.51584
GSM363124	3.24825	6.30122	3.60558	8.19796	3.31367	3.64887	3.49536	3.78576	3.6388	3.74449	3.19188	3.98909	4.20953	3.46567	5.27752	3.45711	4.62223	3.63075	3.71429	4.21658	6.19552	5.91368	4.88093	3.50291	3.88541	5.72142	6.83169	4.82254	3.57841	3.51398	3.64887	3.90454	4.10149	3.56331	5.84825	4.10284	4.11391	3.67353	5.40938	4.46621	3.96191	8.51335	3.65642	3.35293	3.82603	3.72235	4.00419	3.7002	3.48077
GSM363127	3.24897	4.38807	3.59158	7.47722	3.38877	3.75206	3.47492	3.52956	3.56599	3.86233	3.21057	3.62014	3.83476	3.34742	3.92928	3.22681	4.81635	3.47442	3.56599	3.56205	5.94561	5.61382	3.6477	3.18005	3.53547	4.50523	5.59807	5.50454	3.45966	3.35431	3.37892	3.63097	3.66575	3.38779	6.87698	3.47935	3.42717	3.4439	4.96206	4.07007	5.54786	5.74082	3.24109	3.72154	4.15375	4.11142	3.75108	3.64081	3.46999
GSM363144	3.24772	5.10398	3.55064	7.0248	3.36293	4.01247	3.35448	3.63705	3.44238	3.87541	3.29738	3.84561	3.86051	3.64598	3.87044	3.26112	5.1202	3.6142	3.68869	3.60626	5.96309	6.41697	4.90534	3.52382	3.79496	4.68386	6.83709	4.44848	3.55064	3.64201	3.51091	3.42947	3.7602	3.53177	5.87966	3.72643	3.33909	3.32792	5.05035	4.24885	4.32632	7.66176	3.33363	3.28446	3.60824	3.85555	3.57348	3.75722	3.52482
GSM363146	3.26048	4.79868	3.7941	7.30654	3.46413	3.84012	3.30747	3.46413	3.40441	3.87243	3.37895	3.67758	3.91551	3.6159	3.63156	3.38434	5.06239	3.58457	3.89691	3.17431	5.33817	5.98537	4.17694	3.65213	3.46413	5.45273	4.84078	5.45273	3.32608	3.38483	3.42105	3.46805	3.82119	3.19683	6.52781	3.55323	3.78333	3.32094	4.66748	4.10056	3.75591	5.6355	3.56645	3.32706	3.72556	3.75689	3.81956	3.77158	3.33489
GSM363151	3.01831	5.02281	3.35993	7.08826	3.29663	4.07532	3.67542	3.60509	3.73872	4.219	3.68748	3.59203	3.90551	3.54279	4.1778	3.45588	5.08376	3.56188	3.38705	3.52571	6.15517	6.16422	4.29134	3.34284	4.27727	4.52846	8.07025	5.03185	3.59203	3.49657	3.52973	3.72264	3.96345	3.44031	6.28579	3.73169	3.66236	3.31069	5.31519	4.24814	5.17252	7.50758	3.37701	3.66939	4.46315	3.9457	3.91254	3.89848	3.50612
GSM363152	3.35398	4.78542	3.67142	6.60515	3.17131	3.72931	3.42037	3.43783	3.4578	4.20845	3.43184	3.57958	3.91598	3.71633	4.07469	3.37794	5.32645	3.48974	3.65844	3.70635	5.55104	6.21885	5.85051	3.39691	3.96988	4.44403	5.67482	4.70856	3.51769	3.27812	3.70535	3.6784	3.7536	3.31406	6.99146	3.7353	3.4588	3.45406	5.00403	4.11761	5.45621	6.65506	3.46129	3.57259	3.60354	3.61851	3.76325	3.81316	3.53766
GSM363166	3.16258	4.43785	3.57542	7.77317	3.10553	3.6518	3.5643	3.50871	3.48164	4.10139	3.13937	3.4884	3.59186	3.48454	4.20484	3.49469	5.20811	3.32404	3.43426	3.91092	5.63288	7.0938	3.42846	3.2728	3.87805	4.28993	6.35029	5.37377	3.65857	4.31216	3.74655	4.00374	4.02114	3.43619	5.66189	3.86838	3.35498	3.347	5.17653	3.76202	4.19807	8.33943	3.34289	3.34628	5.08178	3.73302	3.81713	3.64407	3.30084
GSM363170	3.31043	4.56749	3.42391	7.64869	2.9876	3.57554	3.31337	3.4513	3.31532	4.01086	3.31141	3.375	3.56967	3.41902	3.64597	3.21799	4.7276	3.26152	3.18326	3.26543	4.94902	5.95858	3.47967	3.39652	3.62445	4.26815	6.9838	4.58315	3.36032	3.31923	3.4963	3.78586	3.51065	3.29087	6.91434	3.6088	3.5276	3.24	5.13782	4.03532	4.06076	7.70836	3.36717	3.34956	3.53837	3.55597	3.60684	3.6988	3.20869
GSM363174	3.27231	5.32049	4.15308	6.2497	3.22056	3.84954	3.44797	3.49424	3.43851	4.1919	3.55694	3.53306	3.80675	3.49424	4.02769	3.41662	5.37622	3.38278	3.53803	3.36088	6.46002	6.45505	3.58481	3.43055	4.07745	4.34218	6.45405	5.59815	3.53903	3.38576	3.82765	3.72912	3.73443	3.7112	6.64513	3.70623	3.96499	3.43976	4.73231	4.19289	4.8378	7.88154	3.28923	3.42259	4.00579	3.67338	3.6903	3.80973	3.36188
GSM363176	3.27783	5.27244	3.55783	7.90882	3.22639	3.89422	3.47027	3.57861	3.34412	4.10496	3.38766	3.50638	4.20786	3.50935	4.4364	3.52172	4.89185	3.60433	3.62115	3.62412	6.01942	5.55441	3.75967	3.37875	4.22468	4.59767	6.81192	4.71838	3.63006	3.95358	3.57366	3.71415	3.67656	3.80913	6.91778	3.74581	3.49154	3.31246	4.8658	4.36616	3.91302	8.19607	3.73889	3.38469	3.60433	3.69733	4.00108	3.63797	3.43564
GSM363180	3.34675	5.42639	3.54594	6.81051	3.16334	3.70568	3.42268	3.44634	3.27871	3.98573	3.05487	3.67807	3.81908	3.62581	4.01728	3.40936	5.1802	3.49565	3.24124	3.46804	6.82169	6.09298	3.84768	3.25603	3.91079	4.18985	6.7073	4.78149	3.44437	3.95121	3.20574	3.62186	3.67577	3.47494	7.24274	3.89599	3.70371	3.28142	4.89982	4.06461	4.29634	6.64419	3.36992	3.65046	3.39605	3.76287	3.83683	3.77766	3.51981
GSM363190	3.35637	5.03214	3.30427	7.58616	3.38145	3.69596	3.33563	3.35637	3.4567	3.95934	3.26568	3.36988	3.84646	3.44127	3.88795	3.27871	4.47837	3.80401	3.23095	3.31681	4.98294	5.96988	4.43689	3.65351	3.73552	3.93908	6.52461	4.36164	3.4567	3.56475	3.29366	3.6101	3.56025	3.44706	6.295	3.51362	3.31971	3.33225	4.59029	4.25938	4.18027	6.78252	3.26713	3.51555	3.74709	3.59949	3.66412	3.71815	3.40123
GSM363194	3.04206	5.56363	3.17657	6.08542	3.08397	3.76627	3.26088	3.26722	3.3335	3.76139	3.14733	3.30913	3.63858	3.51187	5.51782	3.26819	4.64675	3.42707	3.54209	3.18827	7.20991	6.23715	4.85404	3.15513	3.39101	4.1503	5.88041	5.07822	3.37931	3.20874	3.09859	3.35787	3.52422	3.07715	6.53151	3.95731	3.12783	3.13052	4.58112	3.94074	5.04898	6.94901	3.37151	3.3179	5.1445	3.65808	3.74482	3.51674	3.29695
GSM363198	3.46718	4.60329	3.65271	7.92816	3.07418	3.70757	3.40683	3.70059	3.59984	4.31802	3.41531	3.54199	3.91803	3.7335	5.15888	3.56942	4.86462	3.52005	3.4981	3.49012	6.33588	6.88449	3.97788	3.45322	3.74846	5.12297	6.15434	4.53845	3.51406	3.36544	3.64573	3.6158	3.87581	3.51705	5.3055	3.83524	3.63276	3.40658	4.98532	4.54244	4.4816	6.41169	3.46618	3.93798	5.37034	3.88113	3.84622	3.932	3.62877
GSM363204	3.34323	5.77131	3.58954	6.81854	3.06674	3.62167	3.23176	3.37049	3.34128	3.72779	3.14268	3.19233	3.64698	3.42306	5.35267	3.09448	4.78573	3.35199	3.25464	3.18843	6.14905	5.9816	4.51346	3.29553	3.49121	4.15324	7.52373	5.0499	3.34518	3.17091	3.54963	3.57591	3.585	3.2303	5.26213	3.62946	3.38607	3.15971	4.50957	4.10067	5.39746	7.29721	3.32473	3.48829	5.32736	3.76771	3.57786	3.60609	3.52578
GSM363209	3.61561	4.55455	3.99883	6.72907	3.20788	3.51074	3.34412	3.50486	3.32942	4.01647	3.22651	3.43331	3.9263	3.56758	4.6212	3.28188	5.2171	3.43331	3.34412	3.33236	5.87083	5.82574	2.96874	3.41175	3.94002	4.94071	5.54445	4.57513	3.51466	3.18632	3.30687	3.55288	3.59405	3.5225	5.71303	3.65089	3.37058	3.31006	4.79467	4.06744	4.31148	6.37264	3.41665	3.34314	4.05763	3.63031	3.68716	3.61463	3.3353
GSM363215	3.27908	5.46286	3.32212	7.00705	3.18031	3.38862	3.26931	3.48641	3.22236	4.0282	3.12848	3.60181	3.68787	3.49521	4.91912	3.25513	4.62443	3.49521	3.27517	3.18911	5.97922	6.25011	4.42623	3.55389	3.69374	4.94161	6.10146	4.98464	3.52944	3.09132	3.22432	3.56171	3.60311	3.33678	6.61294	3.80914	3.41795	3.30476	4.74015	3.9529	5.04429	6.97315	3.37639	3.47076	4.61791	3.70254	3.67907	3.54607	3.27615
GSM363218	3.0309	4.21512	3.39144	7.43035	3.17355	3.49794	3.45544	3.52334	3.22631	3.77836	3.14912	3.54386	3.50673	3.35724	3.27517	3.15108	5.24691	3.43052	3.35822	3.16085	6.09794	6.37739	4.57761	3.33965	3.66893	4.19655	6.49855	4.58152	3.28298	3.24683	3.36701	3.70215	3.46439	3.48035	4.78573	3.88877	3.22924	3.34576	4.96453	4.6079	4.47306	4.90884	3.29764	3.44909	4.4887	3.65036	3.6064	3.46765	3.45006
GSM363224	3.42024	5.44088	3.62269	8.10215	3.17181	3.43393	3.40703	3.47696	3.31069	3.87894	3.12389	3.297	3.61682	3.52978	4.09509	3.2882	4.65355	3.42121	3.43588	3.51022	6.7544	6.47859	3.91024	3.14932	4.08922	3.98066	6.35634	4.87655	3.55325	3.36644	3.26864	3.52782	3.54803	3.6266	6.23799	4.10878	3.37916	3.38845	4.77581	4.56651	4.36503	8.06434	3.34297	3.60509	4.01684	3.69507	3.71169	3.71169	3.54983
GSM363226	3.35597	4.9971	3.55594	7.34618	3.28528	3.72762	3.68571	3.6034	3.85185	4.40023	3.58523	3.64986	4.11342	3.74883	3.76499	3.50292	5.12401	3.53271	3.66097	3.70036	6.46553	6.42008	4.45578	4.35075	4.70725	4.50123	6.38675	4.76482	3.70238	3.55897	3.78115	3.94981	3.61451	3.92052	6.9614	4.23562	3.49635	3.48322	4.93751	4.37297	4.17199	6.53117	3.61805	3.64885	3.40445	3.69834	4.20734	3.90537	3.5014
GSM363241	3.32781	4.56431	3.67272	8.45007	3.13498	3.83871	3.6434	3.58923	3.21152	4.24723	3.56537	3.84666	4.12001	3.61109	4.45	3.22742	5.5056	3.62004	3.91724	3.61606	6.11192	6.14472	5.2919	3.75025	4.06633	4.39533	8.5054	4.5822	3.89934	3.31887	3.6598	3.81784	3.70751	3.7254	6.27294	3.71447	3.64886	3.37403	5.18256	4.36552	3.72739	8.64919	3.43417	3.4779	3.72639	3.59121	3.84965	3.70154	3.58773
GSM363243	3.30275	5.34318	4.06094	7.68483	3.35256	4.09083	3.58719	3.81186	3.54186	4.38772	3.34061	3.9892	4.37876	3.44821	4.39171	3.57474	5.10872	3.89356	3.84573	3.55481	6.17509	6.28568	4.21337	3.75109	4.21736	5.10407	5.70882	5.23359	3.90053	3.48707	3.68433	4.0988	3.79359	3.73315	7.2242	4.39171	3.65444	3.51446	4.91676	4.46045	3.67537	7.96446	3.67885	3.68633	3.85869	3.92942	3.8547	3.82581	3.51147
GSM363245	3.21989	4.70994	3.27694	7.04638	3.26534	4.27095	3.32191	3.26631	3.38331	3.99828	2.99847	3.19669	3.6086	3.23537	3.87934	3.07099	4.56812	3.3514	3.29532	3.2286	5.58598	6.08009	4.25258	3.17155	3.47226	4.20907	4.72928	4.66256	3.50514	3.26341	3.28951	3.42875	3.37815	3.04295	5.13733	3.61054	3.18702	3.21772	4.89366	3.45776	4.70704	4.80631	3.19572	3.10483	3.67435	3.48193	3.57476	3.34946	3.30595
GSM363265	3.50973	4.60505	4.01586	7.27643	3.27131	3.6729	3.32896	3.36512	3.10032	4.10966	3.10325	3.74716	3.71394	3.40322	3.72762	3.29379	4.61482	3.3573	3.67974	3.21757	4.97048	6.56803	5.21573	3.2762	3.73446	5.61537	5.38282	4.22398	3.40615	3.08957	3.60841	3.27327	3.73869	3.2889	6.07167	3.59669	2.97623	3.13403	5.08578	3.98166	4.50148	6.23387	3.43156	3.44035	3.65434	3.88493	3.58301	3.58008	3.26203
GSM363267	3.15872	4.40522	3.73037	7.59665	3.25484	3.78096	3.64134	3.57254	3.6727	4.00557	3.41065	4.19275	4.27268	3.60694	3.85279	3.61655	4.94179	4.08651	3.51284	3.73442	5.40281	5.92084	5.95119	3.44809	4.387	4.6875	5.93399	4.07639	3.87809	3.5695	3.9823	4.13811	3.79951	3.54117	6.42773	3.91552	3.42988	3.45871	4.60858	4.48717	4.22512	7.08032	3.91805	3.33376	3.89023	3.72734	3.90743	3.88719	3.48552
GSM363268	3.33988	4.53234	3.58629	7.11418	3.14987	3.93462	3.5274	3.2904	3.2805	4.19983	3.30722	3.87129	3.8792	3.38936	3.53878	3.45912	4.61249	3.49821	3.40816	3.42399	5.62386	5.85542	3.81983	3.45368	3.59321	4.40864	5.76339	5.31411	3.4141	3.29436	3.86634	3.67931	3.71658	3.26665	5.68026	3.38243	3.34285	3.30079	4.82526	4.37994	4.25228	6.56331	3.49821	3.70009	3.91879	4.04546	3.64764	3.77233	3.29683
GSM363269	3.41964	6.04698	3.47373	7.97516	3.17524	3.79426	3.68909	3.56789	3.50178	4.13282	3.34251	3.65503	4.02664	3.59994	5.36886	3.28191	4.8283	3.71813	3.48275	3.44468	5.56718	6.32944	6.29739	3.79326	4.07572	5.24065	6.05599	5.19457	3.6961	3.5158	3.77923	3.66004	4.07839	3.52882	7.80688	3.70812	3.78424	3.54284	5.80257	4.85501	4.4844	8.39351	3.50478	3.66905	4.75384	4.09075	3.84434	3.84534	3.48074
GSM363273	3.16781	5.29003	3.67711	8.38213	3.26587	3.57805	3.64559	3.72113	3.33291	4.13837	3.33191	3.62808	3.80318	3.60907	5.08191	3.492	4.82109	3.37994	3.57405	3.30289	6.48671	6.14852	4.06433	3.52002	3.76916	5.68025	8.07662	4.85978	3.44297	3.42596	3.58405	3.59006	3.86688	3.50401	7.66139	3.71012	3.38294	3.30239	4.86379	4.43854	3.86821	8.57958	3.45098	3.43297	3.58805	3.80618	3.75415	3.89523	3.50451
GSM363275	3.34731	5.01742	3.69027	7.95719	3.36051	3.98654	4.07279	3.87797	3.81101	4.67853	3.30369	4.73028	4.77289	3.77448	4.68056	3.87392	5.10772	3.5959	4.06568	3.5056	5.98539	5.77435	4.28383	3.4153	4.01495	5.45676	6.72101	4.86117	3.89319	3.43457	5.16252	3.66287	4.1012	3.71766	7.63013	4.03626	3.43153	3.43001	5.50648	4.39037	3.89522	8.2467	4.23056	4.13367	3.58271	3.98756	4.03423	3.96523	3.64055
GSM363288	3.20611	4.98728	3.78868	7.24015	3.18348	3.5653	3.47427	3.48854	3.34979	4.2079	3.46689	4.11539	4.11736	3.54463	5.20378	3.47329	4.91971	3.4846	3.45803	3.5899	6.0983	6.38565	4.13212	3.32322	4.0593	4.68616	6.426	5.15851	3.31337	3.42359	3.88217	3.58301	3.64468	3.51019	7.20637	3.85068	3.41572	3.30427	5.10832	4.0593	3.75621	7.73875	3.58645	3.69815	5.09848	3.81624	3.522	3.97467	3.43491
GSM363289	3.27167	5.14912	3.43605	7.27941	3.53309	3.54695	3.46031	3.82619	3.36475	4.048	3.22909	3.75985	3.55289	3.32911	4.75106	3.24395	4.88011	3.643	3.70143	3.57567	5.58383	6.6295	4.52529	3.49645	3.6836	4.73521	6.2146	6.23341	3.49645	3.37763	3.51527	3.7044	3.79979	3.31227	5.76999	3.7341	3.26276	3.31277	4.95405	4.9184	4.655	8.38878	3.55587	3.77371	4.41636	4.34309	3.69648	3.64895	3.28306
GSM363290	3.28816	5.17798	3.81228	7.07242	3.39793	3.89832	3.7396	3.61648	3.44836	4.22961	3.53539	4.01699	3.92601	3.68372	4.69539	3.28469	4.99009	3.75097	3.50473	3.60659	5.95527	6.88485	4.0605	3.74009	4.1406	4.79527	6.56543	5.30258	3.51462	3.15267	3.40386	3.62637	4.01963	3.55714	6.71278	3.52154	3.49286	3.49064	4.93372	3.79053	4.05358	7.09615	3.47259	4.18016	4.03875	4.01798	3.79152	4.16236	3.41227
GSM363291	3.46075	3.85018	3.73805	7.56788	3.28356	3.67198	3.58339	3.88121	3.44874	4.53392	3.5058	3.93126	3.83416	3.60992	4.26262	3.5008	4.8576	3.44374	3.71002	3.65496	5.49997	5.8123	4.58798	3.47177	3.87921	4.91733	5.77727	4.81622	3.5058	3.17645	3.62693	3.95229	3.86186	3.60591	6.83141	3.48078	3.45775	3.50005	5.29374	4.06941	4.0544	8.1475	3.48728	3.38868	3.8702	4.13549	3.81814	3.79512	3.47377
GSM363292	3.30463	3.60442	3.4835	7.70115	3.13076	3.6304	3.63739	3.95517	3.47351	4.16602	3.44253	3.72533	3.73732	3.39557	4.93047	3.23468	4.76725	3.84125	3.55046	3.54346	5.99271	6.04167	3.73732	3.66238	4.19499	4.25095	6.33346	3.75731	3.66637	3.26366	3.51448	3.81627	3.61574	3.26766	6.53132	3.59842	3.40156	3.34161	5.27022	4.11205	4.16801	7.00432	3.34061	3.68536	3.39457	3.98515	3.54946	3.68836	3.55795
GSM363293	3.51984	4.89044	3.74359	7.72932	3.41649	3.6864	3.5404	3.71048	3.45963	4.24828	3.33923	3.95229	3.80178	3.57101	4.90248	3.22986	4.3911	3.68941	3.42351	3.72753	5.46839	6.40554	3.74359	3.71449	4.34361	4.82322	6.02827	4.4921	3.70847	3.30812	3.84092	3.76366	3.76332	3.49977	6.49785	3.57703	3.19474	3.3751	5.45735	4.22922	4.1329	8.01495	3.34876	3.47569	3.91918	3.87202	3.70747	4.0456	3.44609
GSM363309	3.37091	4.65502	3.66581	7.51586	3.40313	3.4129	3.50323	3.26642	3.14241	3.73026	3.36114	3.78104	3.68827	3.43829	3.65312	3.19904	4.47404	3.37481	3.50567	3.17658	5.42451	6.13638	4.78294	3.36212	3.51934	4.94113	6.13052	4.13356	3.63847	3.07405	3.38263	3.54375	3.52422	3.21467	5.5163	3.30548	3.08186	3.28595	4.3396	4.26344	4.88254	6.26268	3.22199	3.37677	3.43731	3.9451	3.46075	3.45489	3.28107
GSM363313	3.37053	4.2583	3.86407	7.72012	3.49993	3.83699	3.76877	3.93028	3.42269	4.20514	3.51197	3.9383	3.91523	3.67849	4.56125	3.44426	4.80334	3.842	3.54006	3.8099	5.89442	6.38495	4.88727	3.91623	4.15498	4.88125	5.52626	5.1541	3.84	3.64639	4.32451	3.68551	3.99816	3.70558	7.92977	3.82395	3.48589	3.60025	5.23034	4.71373	4.24727	8.13073	3.56714	3.82294	4.49504	4.10382	3.73968	4.13993	3.46583
GSM363315	3.20399	4.16479	3.76952	7.47433	3.28165	3.49472	3.52808	3.84021	3.42503	4.03038	3.47979	3.86112	3.62316	3.39217	4.28328	3.19553	5.02437	3.72571	3.41009	3.82528	5.12758	6.5434	3.83324	3.30854	3.96467	4.53617	6.61707	5.25602	3.66398	3.30754	3.80039	3.73666	3.94741	3.56342	6.863	3.66199	3.49273	3.51314	5.02205	4.86573	3.889	6.70867	3.28414	3.76853	4.71638	4.07917	3.70381	3.83324	3.58234
GSM363328	3.85849	4.39032	3.74162	7.86685	3.38608	3.62278	3.85799	3.37618	3.39896	4.22295	3.38311	3.94168	3.69805	3.38707	5.04892	3.25337	4.95087	3.79907	3.33854	3.9704	5.76495	6.80683	4.85381	4.01299	4.08528	4.77161	6.89299	5.62729	3.52671	3.33953	3.55345	3.79213	3.91428	3.6416	7.10196	3.57029	3.60594	3.46556	4.78647	3.93079	4.04963	7.80776	3.48264	3.69013	3.31477	4.02586	3.60297	3.7129	3.40292
GSM363329	3.20156	4.25638	4.01574	7.13307	3.26373	3.62269	3.8147	3.35096	3.41714	4.37269	3.37502	4.09495	4.07991	3.51039	4.25839	3.3274	4.74736	3.56353	3.70691	3.5545	5.63707	6.46228	3.90444	3.80016	4.23432	4.89308	6.49336	4.55418	3.34795	3.19153	3.76707	3.83425	3.85698	3.9285	6.25673	3.70892	3.28178	3.54648	5.11969	3.96861	4.27242	6.38842	3.33793	3.58458	4.45892	3.77509	3.51741	4.21126	3.48031
GSM363330	3.7378	4.82127	3.53909	6.33017	3.91772	3.74571	3.63449	3.82578	3.40465	4.21231	3.82281	3.79513	4.46638	3.56974	3.91673	3.19458	4.78437	3.24351	3.5213	3.70616	4.61763	5.83951	4.64926	3.55887	3.6686	4.35862	4.18661	6.02635	3.54404	3.20693	3.31271	3.76943	3.7981	3.39377	5.7624	3.98692	3.64487	3.45605	4.37938	3.82084	4.68485	4.93167	3.3399	3.93255	4.22022	4.3171	3.67453	4.01756	3.61719
GSM363331	3.98342	4.39367	3.67023	7.57961	3.16292	3.92038	3.57617	3.21696	3.43509	4.32963	3.50113	3.73827	4.04146	3.63421	3.80131	3.32602	4.92133	3.50813	3.33203	3.41107	5.71047	6.29683	4.04246	3.6162	3.93039	4.50374	6.64104	4.15553	3.68724	3.42708	3.75228	3.60119	3.84067	3.57117	6.37888	3.32602	3.01984	3.28074	4.938	4.14852	4.26459	5.95996	3.2975	3.64321	3.84834	3.81332	3.68224	3.84134	3.34603
GSM363336	3.22576	4.34759	3.56011	7.3205	3.15789	3.9294	3.68737	3.27566	3.43236	4.13999	3.39144	3.6679	3.64495	3.42038	3.69485	3.37297	4.86559	3.56909	3.46729	3.27167	6.39463	5.86865	4.4444	3.49823	4.11903	4.69492	6.31678	4.66198	3.47927	3.29762	3.49524	3.72479	3.7035	3.54814	6.94357	3.59504	3.27766	3.3837	4.71987	4.22982	4.26275	7.06799	3.37347	3.36549	3.39044	3.76971	3.80065	3.74475	3.50073
GSM363337	3.34186	4.75777	3.64414	7.03589	3.37534	3.68845	3.31528	3.24537	3.38125	3.98877	3.08881	3.6087	3.97104	3.20992	3.6215	3.18727	4.72232	3.51319	3.32709	3.24734	5.0443	6.14611	3.67368	3.39503	3.76525	5.22449	4.92024	4.62386	3.2946	3.43836	3.333	3.48562	3.41833	3.41177	6.84816	3.66482	3.07798	3.17743	4.4161	4.0764	4.00649	5.53957	3.44082	3.42063	4.99704	3.89523	3.80267	3.59196	3.3586
GSM363339	3.15641	5.51118	3.32953	7.21545	3.2351	3.86461	3.36985	3.32756	3.19477	3.69346	3.06788	3.38067	3.58133	3.53903	3.92559	3.15739	5.00363	3.48887	3.62658	3.24002	6.08462	6.04724	3.74658	4.21379	3.61477	4.01609	7.05348	5.59675	3.27248	3.37084	3.49182	3.601	3.57871	3.26362	6.41807	3.79182	3.27543	3.16748	4.82068	3.93936	5.19544	5.96036	3.35854	3.45149	3.97674	3.65117	3.59313	3.781	3.18641
GSM363341	3.42469	5.35133	3.7243	7.61396	3.36914	3.61121	3.55813	3.48323	3.32548	3.83641	3.29274	3.63601	4.1013	3.39195	4.02788	3.38898	4.68465	3.55168	3.37112	3.53184	6.01405	6.13806	3.88601	3.48422	3.81657	4.49416	5.65392	5.10232	3.73125	3.68561	3.83343	3.45247	3.85195	3.51795	5.43566	3.512	3.38997	3.31159	4.76897	3.75109	4.32253	6.46412	3.59384	3.59236	4.10824	3.84038	3.89891	3.888	3.3865
GSM363348	3.09252	5.58041	3.34453	6.37129	3.2869	3.81437	3.28788	3.45394	3.1609	4.01461	3.24783	3.62683	3.73818	3.31035	5.17602	3.26053	4.56292	3.38263	3.4051	3.18532	6.4351	5.9428	3.74111	3.61706	3.66688	4.45612	6.26612	5.47199	3.36993	3.12085	3.47152	3.51547	3.83619	3.28983	5.92717	3.54771	3.06322	3.30961	4.87224	3.95894	4.01657	4.72702	3.5394	3.61022	3.78507	3.84368	3.58483	3.70497	3.71572
GSM363350	3.74201	4.74556	3.54228	7.12797	3.0596	3.57949	3.31171	3.25835	3.16632	3.66173	3.02141	3.16534	3.5041	3.33276	4.0651	3.16142	5.11108	3.46493	3.56284	3.11247	5.75498	5.99877	5.48084	3.12618	3.42381	4.06119	5.33104	4.96291	3.46298	3.26814	3.27401	3.44927	3.48811	3.08407	5.87149	3.30339	3.20548	3.05323	4.91004	3.6725	4.92277	6.09407	3.38808	3.31416	4.58108	3.80859	3.41696	3.81153	3.20597
GSM363352	3.28149	4.75625	3.44209	7.11333	3.1395	4.03748	3.2952	3.28247	3.20413	4.15009	3.09054	3.44895	3.9043	3.37648	3.48616	3.34172	4.66649	3.49497	3.64284	3.06018	5.02163	6.00579	3.98754	3.58898	3.82596	4.23137	7.31995	4.51242	3.23841	3.57625	3.41075	3.30989	3.63762	3.20707	7.17894	3.55471	3.11012	3.16692	4.5369	3.81029	4.01006	6.12297	3.73636	3.61346	3.91116	4.08742	3.47539	3.67124	3.18308
GSM363355	3.22726	4.37751	3.47956	7.66966	3.20938	3.55306	3.46168	3.2362	3.19944	4.38843	3.14978	3.56597	3.99707	3.49247	4.03879	3.46962	4.56491	3.84807	3.54213	3.24911	6.25883	5.78701	4.89999	3.76265	3.85403	4.2593	6.17241	4.46094	3.42194	3.46764	3.35937	3.5322	3.91198	3.29877	5.66086	3.76265	3.18752	3.28636	5.11355	4.3338	4.21262	6.15553	3.6504	3.46168	3.91264	4.16096	3.85801	3.63551	3.26798
GSM363357	3.28308	5.68069	3.91769	6.29877	3.24441	4.1517	3.41794	3.22954	3.55874	4.02775	3.29895	3.40405	4.0575	3.25631	4.2102	3.47991	4.55989	3.72631	3.77887	3.17004	5.55972	6.27266	5.30192	4.30043	4.03965	4.67425	5.78679	5.87008	3.59443	3.74317	3.79671	3.39513	3.94479	3.28903	5.75209	4.07237	3.56171	3.30514	4.69408	4.03568	5.33761	6.65078	3.67475	3.61228	5.36934	4.30638	3.87703	3.93454	3.38769
GSM363358	3.3185	5.69543	3.56039	7.92475	3.20155	3.90923	3.57139	3.39647	3.57239	3.97121	3.60037	3.59138	4.02418	3.61137	3.38047	3.38947	5.06804	3.7623	3.45944	3.52441	5.59847	5.91233	5.91733	3.65435	4.36203	4.63291	6.15822	4.61292	3.49842	3.48143	3.97121	3.61537	3.77063	3.49842	5.99129	3.7553	3.39947	3.37623	4.99774	4.18211	4.46398	6.23618	3.39447	3.50442	3.80928	4.04317	3.78129	3.62236	3.38347
GSM363360	3.25521	5.31932	3.27772	7.58603	3.12993	3.73184	3.53317	3.30904	3.12015	4.00393	3.09959	3.29632	3.70738	3.19844	4.20359	3.25766	5.05213	3.33351	3.65746	3.54002	5.16175	6.06021	3.79938	3.81895	3.30317	4.29461	5.85272	4.88281	3.40985	3.32568	3.39712	3.37168	3.59417	3.25325	5.40447	3.75435	3.29729	3.16566	4.61073	3.6878	4.52558	6.50194	3.41034	3.23857	4.78494	4.00686	3.74065	3.44704	3.26549
GSM363376	3.04203	4.77579	3.92183	7.21305	3.62657	3.64149	3.63304	3.18121	3.58383	4.10376	3.4188	3.66535	4.1306	3.71306	3.63254	3.82938	4.53885	3.47348	3.555	3.39494	5.71524	5.25197	4.27574	3.55301	4.14849	4.01627	4.88017	4.78871	3.67429	3.97154	3.59476	3.38401	3.73295	3.28062	6.05821	3.48939	3.41085	3.22097	4.45866	3.95762	4.40398	6.25935	3.68622	3.29752	4.48649	4.26679	3.61962	3.80552	3.50877
GSM363378	3.37521	4.03199	3.85242	6.73818	3.73039	4.77708	3.45458	3.17678	3.54883	4.40602	3.65697	3.70062	4.74434	3.905	3.78396	3.77007	4.51284	3.49724	3.96453	3.53692	5.64816	5.80393	5.32374	3.37421	4.60643	4.73541	4.40503	5.37037	3.63613	3.91492	3.17877	3.6788	3.92154	3.64506	6.5381	4.23042	4.01215	3.7222	5.0132	4.31276	3.58554	6.65947	4.1942	3.95659	5.79599	4.95467	4.52508	4.37229	3.90252
GSM363384	3.29781	5.32973	3.37834	6.52361	3.05426	3.5394	3.70145	3.20353	3.34986	3.9342	3.12399	3.57083	3.88313	3.26344	3.49717	3.19715	5.24069	3.5561	3.46378	3.54137	5.58605	5.83353	4.41738	4.21213	3.70636	4.73557	4.66486	4.4272	3.50012	3.36754	3.35085	3.26835	3.41403	3.20746	5.96906	3.86153	3.33219	3.23398	5.08617	4.0658	4.87306	5.66233	3.38129	3.14756	3.63368	3.47262	3.60324	3.56101	3.12742
GSM363386	3.25253	5.24481	3.66602	7.10716	3.22681	4.18041	3.61458	3.48599	3.38509	4.03797	3.23077	3.71845	3.95883	3.31485	3.5493	3.39646	4.75712	3.59876	3.39597	3.39003	5.60488	6.78402	4.43563	3.45433	3.89354	4.33869	4.11512	6.06091	3.46224	3.20604	3.91234	3.77582	3.47543	3.42367	6.63861	4.05083	3.36827	3.36481	5.34076	4.03698	4.13491	6.47835	3.6225	3.9252	3.73032	4.02511	3.9341	3.5859	3.32623
GSM363388	3.02118	3.8747	3.37968	6.9977	3.34039	3.80398	3.5658	3.34432	3.19012	3.9022	2.99073	3.69496	3.91496	3.49263	4.00041	3.28048	4.69285	3.55254	3.36298	3.55156	5.27037	6.09638	3.80496	4.46498	3.81184	4.33534	4.464	4.84018	3.40521	3.49852	3.39834	3.49165	3.80038	3.2294	6.47845	3.53584	3.01431	3.19306	4.66044	3.91104	4.91384	6.02698	3.55843	3.78237	3.85309	3.72737	3.79023	3.54567	3.44401
GSM363393	3.04759	4.83995	3.71777	7.29303	3.42231	3.75593	3.4047	3.15326	3.42231	3.74419	3.29806	3.42035	3.65711	3.27457	3.44872	3.40274	4.78679	3.43992	3.57884	3.16011	5.28315	6.05899	3.62287	3.42426	3.06618	4.09542	5.27728	5.42795	3.5309	3.25892	3.52993	3.1875	3.56319	3.16206	7.73101	3.53286	3.17478	3.15644	4.59634	3.87529	3.84202	6.24194	3.49373	3.42231	3.81267	3.81463	3.46927	3.70897	3.39198
GSM712542	3.67445	4.70924	4.75784	6.20407	3.10338	3.8405	3.5094	3.46688	4.01465	4.91681	3.55193	3.55092	3.94276	4.25563	5.55369	3.8162	5.19593	3.4527	3.22691	4.59382	6.64012	5.77239	3.58737	3.90834	3.77064	4.46624	5.61039	4.18273	4.59888	3.22084	3.42334	4.02883	4.16822	3.41321	5.00186	4.10983	4.28196	4.22551	4.94719	4.10274	4.59382	6.57904	3.23704	3.44663	3.7838	4.74569	3.53877	3.9377	3.87594
[truncated: 561 more columns]
