# Supplementary material for: Identification of a novel four-lncRNA signature as a prognostic indicator in cirrhotic hepatocellular carcinoma
Source: PeerJ. 2019 Aug 1;7:e7413. doi: 10.7717/peerj.7413 (PMC6679908; doi:10.7717/peerj.7413)
Supplement: Table S2 [file peerj-07-7413-s002.xlsx]

## Sheet: Sheet1
lncRNA	HR	z	pvalue
LINC01587	1.59164	0.631882	0.527464
AC016026.1	0.783387	-0.88635	0.375429
IGF2-AS	0.983011	-0.0278882	0.977751
PINK1-AS	0.488946	-2.26819	0.0233179
KIAA0087	0.887341	-0.167227	0.867192
DKFZP434K028	2.00297	1.34145	0.179774
FAM182A	0.564122	-0.621192	0.534473
C22orf24	0.276192	-1.85593	0.0634636
TTTY1B	0.683549	-0.565638	0.57164
H19	0.696244	-0.650551	0.515337
TTTY9B	0.44024	-1.1373	0.255412
AL139352.1	0.431638	-1.51916	0.128721
C7orf69	1.3603	0.542915	0.587188
AL355922.1	2.04285	0.972914	0.330596
LINC01558	0.65658	-1.44866	0.147433
PART1	0.984422	-0.0238835	0.980946
ZFHX2-AS1	1.07224	0.11118	0.911473
AC008080.1	0.442465	-1.00511	0.314843
TMEM51-AS1	0.470951	-0.968776	0.332657
FAM182B	0.868507	-0.249058	0.803316
DLEU1	0.760289	-0.847407	0.396768
AC008969.1	0.443217	-1.83697	0.0662142
TTTY14	1.18245	0.866085	0.386444
AP003471.1	0.847332	-0.380647	0.703465
LINC00652	0.468216	-1.62615	0.103918
AC004832.1	0.856044	-0.433149	0.664906
TP53TG1	0.817983	-1.03743	0.299534
LINC00334	1.25265	0.683691	0.49417
PRKCZ-AS1	1.06354	0.0887918	0.929247
WT1-AS	0.957356	-0.0757728	0.9396
AC131971.1	0.360623	-1.73442	0.0828442
DSCR4	1.07758	0.145198	0.884554
AP001062.1	0.430464	-0.993564	0.320435
AC132216.1	0.386308	-1.67894	0.0931632
MIR22HG	0.808987	-0.933207	0.350713
C2orf27B	1.01765	0.0282246	0.977483
LINC00846	1.54536	0.786934	0.431321
TCL6	1.77735	0.859427	0.390105
GARS-DT	0.56314	-1.05882	0.289682
PDXDC2P-NPIPB14P	0.733275	-0.719984	0.471535
SNHG17	1.22597	1.00021	0.31721
AC068631.1	0.719636	-2.16199	0.030619
AP000550.1	1.08197	0.0947001	0.924553
AL157838.1	0.948923	-0.0865872	0.931
AFDN-DT	0.765998	-0.862606	0.388354
NBR2	3.38956	2.56789	0.010232
LINC01565	0.632281	-0.664203	0.506561
AC105020.1	0.76624	-0.361043	0.718068
ADD3-AS1	0.563088	-0.542858	0.587228
LINC00632	0.953689	-0.079417	0.936701
LINC00963	1.56423	0.864054	0.387558
LINC00474	1.46369	0.500005	0.617072
HCG9	1.11378	0.183898	0.854094
ATP6V0E2-AS1	0.833307	-1.08519	0.277839
RFPL3S	1.89475	1.03125	0.302424
HCP5	1.05548	0.304056	0.761085
AP000346.1	1.04833	0.415935	0.677458
TTTY2	0.31562	-1.1975	0.231111
U73169.1	0.556936	-0.78197	0.434232
ZNF337-AS1	0.849635	-0.331264	0.740445
AL157395.1	1.6026	0.739447	0.459636
PAXIP1-AS2	0.884067	-0.486817	0.626388
AC010336.1	0.3681	-1.70435	0.0883149
MEG3	0.870603	-0.666202	0.505282
POLR2J4	0.237155	-2.54419	0.0109531
CD27-AS1	1.45441	0.733644	0.463166
LINC00588	0.368547	-0.944005	0.345167
MCM3AP-AS1	1.26569	0.555172	0.578777
AC245128.1	0.193639	-1.57663	0.114881
ARHGAP27P1-BPTFP1-KPNA2P3	1.7681	1.81078	0.0701756
AC110619.1	0.620494	-0.480905	0.630584
LINC00339	1.49114	1.12558	0.260345
AC125494.1	0.614963	-0.929494	0.352633
IGBP1-AS2	1.0072	0.018864	0.98495
GAS8-AS1	1.77708	1.06214	0.288172
AC020907.2	1.09513	0.160471	0.87251
AC137630.1	1.02418	0.0745695	0.940557
TH2LCRR	0.718119	-1.18306	0.236784
AL359706.1	1.3476	0.755912	0.449702
IL10RB-DT	1.66124	1.42471	0.15424
PRKRA-AS1	0.893879	-0.424637	0.671101
AC007319.1	1.10618	0.482528	0.629431
SNHG14	1.27584	0.94245	0.345962
HAGLR	0.400598	-1.00465	0.315067
AC022400.1	0.488982	-1.15646	0.247493
AP000345.1	1.34676	0.694032	0.487662
AL136988.1	0.877078	-0.628743	0.529517
AC138150.1	1.16045	0.646161	0.518175
AC010907.1	0.971978	-0.0721828	0.942456
LAMTOR5-AS1	0.711186	-1.39295	0.163635
CDKN2A-DT	0.589164	-0.587094	0.557141
MRPL20-AS1	1.08332	0.262894	0.792633
AC034187.1	1.51356	0.978679	0.327738
AL591684.1	1.42409	1.16738	0.243057
AL353150.1	1.06613	0.17855	0.858291
INE1	1.09257	0.153713	0.877836
AL355336.1	0.44081	-2.02156	0.0432214
AL354740.1	0.610338	-1.03473	0.300793
RFPL1S	1.43208	0.332267	0.739687
AP000320.1	1.35662	0.442724	0.657965
CADM3-AS1	0.643621	-0.722479	0.47
FGD5-AS1	0.806155	-0.311669	0.755292
RUSC1-AS1	1.49442	2.08191	0.0373509
LINC02249	1.89081	1.09306	0.274368
AL807761.3	0.724448	-1.29712	0.19459
ZNF32-AS1	1.15134	0.425339	0.67059
CFLAR-AS1	0.744263	-0.920977	0.357062
AL359182.1	3.29681	1.74843	0.0803901
SLC16A1-AS1	0.498145	-0.842656	0.399421
AC093642.1	1.47412	2.11192	0.0346931
PLCL2-AS1	1.03697	0.108524	0.91358
LINC01824	0.761438	-0.482079	0.62975
TEX41	0.509323	-1.07029	0.284489
FAM30A	1.19526	0.240965	0.809582
CACTIN-AS1	0.398922	-1.16957	0.242172
ZNF451-AS1	0.99007	-0.0445355	0.964478
SLC8A1-AS1	0.736866	-0.374696	0.707886
SMIM2-AS1	1.3844	0.736368	0.461507
LINC01806	0.881504	-0.223684	0.823003
SPAG5-AS1	0.825451	-0.750258	0.453099
AL031779.1	1.05924	0.272953	0.784889
AC006042.1	0.56652	-0.708796	0.478451
AL512353.1	0.231388	-3.08872	0.00201018
AC093495.1	1.09143	0.239121	0.811012
AL512770.1	1.17206	0.58685	0.557304
AC115618.2	1.52551	1.38624	0.165674
LINC02585	0.293276	-1.57355	0.115591
AP001468.1	1.55657	1.36394	0.172588
AL133410.2	1.28307	0.583629	0.55947
AL121985.1	1.28471	0.746581	0.455317
AL359853.1	0.765704	-0.284623	0.775933
ALG13-AS1	1.09837	0.272597	0.785163
AL358074.1	0.469381	-0.834364	0.404076
ACVR2B-AS1	0.618577	-0.636167	0.524668
AC019349.1	1.98607	0.965373	0.334358
XIST	1.03627	0.479896	0.631301
KIF25-AS1	0.836335	-0.2455	0.806069
ATXN8OS	0.688113	-0.684696	0.493536
AC091133.1	0.999536	-0.00120853	0.999036
AC092683.1	1.96454	1.5957	0.110556
AL929472.2	1.31382	0.699551	0.484208
HCG18	1.71361	0.949379	0.342428
AL592161.1	0.488434	-1.10719	0.268212
KLF3-AS1	0.497025	-1.07623	0.281825
GS1-600G8.3	0.620789	-0.49556	0.620205
LINC00689	1.05594	0.12467	0.900785
DLEU2	0.681651	-0.683302	0.494416
LINC00574	0.536863	-1.31655	0.187989
AL355312.2	0.885266	-0.454544	0.649437
AC067945.3	1.03937	0.190046	0.849273
MYO3B-AS1	1.28104	0.770903	0.440764
AC007383.3	0.869593	-0.633271	0.526556
ELN-AS1	0.890537	-0.173139	0.862542
BPESC1	2.84175	1.04141	0.297684
AC254562.2	0.536636	-1.32722	0.184435
AC135050.1	0.905396	-0.162026	0.871286
COL4A2-AS1	0.830903	-0.755553	0.449917
SMG7-AS1	0.558274	-0.678379	0.497531
DLGAP4-AS1	1.93334	1.66909	0.095099
HOXB-AS3	1.20881	0.567529	0.570355
AC093797.1	0.594939	-3.9465	7.93e-05
AL138889.1	1.01516	0.0281816	0.977517
AC016876.1	1.27035	0.87242	0.382979
LINC00472	0.581992	-0.697024	0.485788
AL356134.1	0.276525	-1.47191	0.141046
Z83844.2	0.658737	-0.714407	0.474976
FAM224A	0.495402	-0.738707	0.460085
AL138789.1	0.847296	-0.541408	0.588227
SLC26A4-AS1	1.02248	0.0905101	0.927882
MYCNOS	1.27873	0.283331	0.776923
LINC01136	0.319618	-1.52451	0.12738
LINC01949	2.17658	0.895126	0.37072
TTTY15	1.22259	0.40553	0.685088
YEATS2-AS1	2.18354	2.77686	0.00548864
AC008443.1	2.19206	2.23051	0.0257138
Z95624.1	3.85165	1.48152	0.138469
AL451067.1	2.95593	1.31718	0.187779
AC007405.1	0.766359	-0.498014	0.618474
SP2-AS1	0.562605	-0.570355	0.568437
MAPKAPK5-AS1	4.90187	2.42045	0.0155014
SNHG20	1.52084	1.02044	0.307518
GTF3C2-AS1	0.531181	-1.05424	0.291775
AC012074.1	1.02191	0.0295759	0.976405
AC137630.2	0.645022	-0.765249	0.444123
MCF2L-AS1	1.28676	1.44892	0.14736
AL596202.1	1.37001	1.24108	0.214575
AL133481.1	0.818048	-0.765985	0.443685
LINC01278	0.457137	-1.12527	0.260476
GNAS-AS1	3.4896	1.55875	0.119056
AL356599.1	0.280116	-1.46502	0.142914
SAPCD1-AS1	1.2969	1.0775	0.281256
AC007389.3	0.577345	-0.884049	0.37667
LINC00837	0.640937	-0.44668	0.655106
GSN-AS1	1.13002	0.166064	0.868106
EGOT	0.989511	-0.0240034	0.98085
UBOX5-AS1	0.501046	-1.30557	0.1917
HGC6.3	0.959753	-0.0761612	0.939291
ASMTL-AS1	0.613415	-2.14764	0.0317421
AL445231.1	0.939955	-0.13731	0.890786
TMEM147-AS1	0.544743	-1.26737	0.205023
KDM4A-AS1	1.28812	0.776282	0.437582
AC091132.2	1.37949	0.584895	0.558618
DIAPH2-AS1	1.05869	0.0728886	0.941895
LINC01361	1.04072	0.0672496	0.946383
PITPNA-AS1	0.706951	-1.13356	0.256979
LINC01923	1.02806	0.119823	0.904623
AL133215.1	0.910163	-0.560281	0.575288
AL117378.1	1.94538	0.708296	0.478761
CBR3-AS1	0.733749	-0.717667	0.472962
AC007750.1	1.07662	0.208944	0.834492
AP001615.1	1.00101	0.00487211	0.996113
MIR600HG	0.3249	-1.6525	0.0984332
AC007359.1	0.654772	-0.50846	0.611131
AC245052.4	0.549896	-1.27568	0.202068
EHMT2-AS1	0.824076	-0.660441	0.508971
HAND2-AS1	0.846487	-0.252987	0.800278
LINC00987	1.77034	2.10137	0.0356086
AL359924.1	0.933235	-0.0926609	0.926173
LINC00857	1.25151	0.251086	0.801747
AC104623.1	1.61113	1.52815	0.126475
DDR1-DT	0.386816	-1.68352	0.0922744
PHKA2-AS1	1.02429	0.0726117	0.942115
DGUOK-AS1	0.793007	-0.534041	0.593313
KCNQ1DN	0.7536	-0.584049	0.559187
AC093110.1	0.832745	-0.233077	0.815701
AC244197.2	0.606297	-0.668726	0.503671
AL139095.4	1.2026	0.780268	0.435233
AL121748.1	1.82373	2.7937	0.00521085
AC017116.1	0.733297	-0.761169	0.446556
AL450384.2	0.919621	-0.433652	0.664541
AL365273.1	1.9955	2.2294	0.0257874
AC034238.1	0.98522	-0.0726333	0.942098
LINC02067	1.77776	1.17604	0.239577
MME-AS1	0.908541	-0.719136	0.472057
NDUFB2-AS1	0.354287	-1.22643	0.220036
ZBTB20-AS2	0.680089	-1.91131	0.0559654
AC004690.2	1.38322	0.556373	0.577956
AC093010.2	0.635003	-0.617843	0.536679
LINC01327	1.16277	0.2601	0.794787
AL158847.1	1.02572	0.202971	0.839158
AC245088.1	0.599631	-0.708409	0.478692
AL021937.4	1.33697	0.67592	0.499091
AC109466.1	1.03803	0.11031	0.912164
WWTR1-IT1	2.54247	1.06726	0.285852
SNHG3	1.54753	0.982485	0.325861
AL590705.3	1.21484	0.565641	0.571638
LINC00960	2.66765	0.871975	0.383222
AL645608.5	1.166	0.663105	0.507264
AC009228.1	0.792705	-0.329162	0.742033
AC000120.1	1.42418	1.21789	0.223266
AC006547.2	1.47577	0.890217	0.37335
AL390195.1	0.837287	-0.421682	0.673257
AC010973.2	0.965125	-0.126206	0.899569
FLNB-AS1	1.33596	0.681034	0.49585
CSPG4P2Y	1.35206	0.518233	0.604296
AC134772.1	2.03632	1.51006	0.131029
OR2A1-AS1	1.4393	0.850831	0.394863
AL021707.5	0.803152	-0.685334	0.493133
AC006455.8	0.621252	-0.697266	0.485636
AL133375.1	0.878172	-0.38786	0.69812
CXXC4-AS1	1.02799	0.0657707	0.94756
NEAT1	1.23615	0.889713	0.37362
DRAIC	1.56613	0.855197	0.392442
UBR5-AS1	1.35123	1.26396	0.206246
AC044802.1	1.13755	0.228634	0.819153
AC012377.1	2.10847	0.976892	0.328623
AP000487.1	1.01743	0.0653765	0.947874
AP000873.2	2.14154	2.25249	0.0242913
CSTF3-DT	1.14747	0.515475	0.606221
AC098487.1	0.616863	-0.758289	0.448278
LINC02469	0.439238	-1.57815	0.114532
AL691482.3	1.17253	1.00024	0.317192
LINC00939	0.607676	-0.753731	0.451011
LINC01091	4.16013	1.97837	0.0478873
AC106864.1	0.348615	-1.49769	0.134214
AC096564.2	0.41447	-0.950253	0.341984
NOP14-AS1	1.22353	0.275628	0.782834
AC110760.2	0.577184	-0.940577	0.346922
PVT1	0.650597	-0.51743	0.604856
MCPH1-AS1	0.371771	-1.05193	0.292833
AC104116.1	1.40421	1.09115	0.275206
AC020659.2	1.05607	0.138339	0.889972
AC105914.2	0.568593	-0.87236	0.383012
FAM242C	0.594476	-0.958318	0.337902
AC104407.1	1.41269	0.59529	0.55165
LINC00604	1.22619	0.687318	0.491882
KHDRBS2-OT	0.429182	-1.23282	0.217645
AC111000.4	0.979742	-0.185195	0.853076
AC131953.1	0.909268	-0.416805	0.676821
AC244502.1	0.286844	-1.39806	0.162095
THAP9-AS1	1.19312	0.716112	0.473922
AC114980.1	0.4405	-1.15242	0.249148
AC097478.1	0.97262	-0.098871	0.921241
AC004069.1	1.75066	1.38384	0.166408
LINC02172	0.935126	-0.10961	0.912719
AC027698.1	0.520186	-1.33403	0.182193
AC009630.2	1.43431	1.35926	0.174065
LINC00599	0.39749	-1.52405	0.127495
TUG1	1.18111	0.609499	0.542194
AC083841.2	1.20885	0.371427	0.710319
AC010834.1	0.867271	-0.20408	0.838291
AC009902.2	1.43872	2.9024	0.00370313
CASC19	1.05223	0.0812573	0.935237
AC011365.2	2.62005	2.7232	0.00646531
AP003692.1	1.06594	0.310658	0.75606
HOXA-AS3	0.892793	-0.165038	0.868914
RHPN1-AS1	1.32891	0.396409	0.691803
AP001972.1	0.811724	-0.53483	0.592767
AP002812.2	0.816131	-0.644932	0.518971
AC007876.1	0.932371	-0.113421	0.909697
AP003068.1	0.949873	-0.157875	0.874556
AP000873.3	1.08879	0.369696	0.711609
AC069287.2	2.68839	1.84298	0.0653325
AP003393.1	1.13755	0.216827	0.828343
WAC-AS1	2.00271	0.799196	0.424177
AP000879.1	1.31576	1.20885	0.226721
RNF185-AS1	0.626573	-0.581655	0.560799
AP002807.1	1.6291	1.78853	0.0736913
GRM5-AS1	0.499205	-0.718023	0.472743
AP006621.1	0.553865	-1.71284	0.0867412
AP003392.3	1.07163	0.28675	0.774304
AC109322.1	0.722128	-0.558544	0.576473
AC120036.4	1.36575	1.38724	0.165369
AP001267.2	1.59091	0.585077	0.558496
CD44-AS1	0.923763	-0.0800517	0.936196
AC068385.1	0.331221	-1.65254	0.098424
AGAP2-AS1	0.65127	-0.780181	0.435284
AC117503.1	1.86195	1.42868	0.153097
PXN-AS1	0.904821	-0.141666	0.887344
DENND5B-AS1	1.14281	0.793683	0.42738
RPS6KB2-AS1	0.828677	-0.52616	0.598777
ARAP1-AS1	1.58572	1.08889	0.276203
PAPPA-AS1	1.00039	0.000632754	0.999495
AC027290.1	1.78909	1.56131	0.118449
AC055720.2	0.945036	-0.345377	0.729811
AP006333.1	0.338109	-1.45592	0.145414
AC069234.3	1.61384	1.6573	0.0974585
AP003170.4	0.943168	-0.159858	0.872993
AC008011.2	1.1363	0.315275	0.752553
AL161747.2	1.04881	0.167245	0.867178
AC023509.2	1.01023	0.0131809	0.989483
PSMA3-AS1	0.898107	-0.25512	0.79863
KRT7-AS	0.761534	-1.21645	0.223812
AC025265.1	0.561238	-1.37721	0.168446
AC005841.1	1.37709	1.07371	0.282951
NKX2-2-AS1	1.99091	0.972772	0.330667
AC073896.4	0.832099	-0.451224	0.651828
AC011603.3	0.36966	-1.28797	0.197758
TESC-AS1	1.07572	0.140146	0.888545
CR383656.12	1.37631	1.43913	0.150115
AL583722.2	0.593977	-1.72904	0.0838018
AL163636.1	0.918183	-0.878747	0.379539
AL160314.2	1.38606	0.601306	0.547636
AL161668.3	0.746132	-0.737578	0.460771
AC004817.1	0.28747	-1.13856	0.254888
AL049830.3	1.09936	0.864681	0.387214
AL160006.1	0.476275	-1.10956	0.267187
AL157871.4	1.3802	2.04151	0.0412006
PRC1-AS1	1.43958	2.27827	0.0227107
AL160236.2	2.18344	2.49945	0.0124386
AL162311.3	1.43981	1.41482	0.15712
AL137230.2	0.922498	-0.261326	0.793841
FOXN3-AS2	0.71987	-0.51074	0.609533
AL133467.3	1.50686	0.477687	0.632873
AC023024.1	0.89886	-0.786695	0.43146
AC122108.1	0.810526	-1.67858	0.0932349
AC020658.2	1.49086	1.08262	0.278976
ZNF710-AS1	1.40797	0.996356	0.319077
PLCB2-AS1	2.76189	1.72089	0.0852706
AC090515.4	1.21162	0.317673	0.750733
AC103740.1	0.98213	-0.0310933	0.975195
MAPK6-DT	0.815211	-0.454935	0.649156
AC036108.1	0.883515	-0.196021	0.844594
AC023908.2	0.458098	-1.18502	0.23601
AC074212.1	0.895086	-0.216118	0.828895
AC108449.3	0.922679	-0.312665	0.754535
AC079328.2	1.02237	0.112276	0.910604
AC022613.3	0.918211	-0.159237	0.873482
AC068831.4	0.806334	-0.847968	0.396456
AC023906.4	0.952055	-0.192508	0.847344
AC026461.1	0.904114	-1.12102	0.262277
VENTXP1	2.20155	0.98778	0.323261
AC099668.1	1.09427	0.517641	0.604709
AC093010.3	0.917885	-0.389122	0.697186
MIR762HG	0.742319	-0.858342	0.390704
AC009087.1	0.683352	-0.933686	0.350466
ITFG1-AS1	0.896593	-0.622505	0.53361
HEXA-AS1	2.19039	0.958967	0.337576
AC009052.1	0.731695	-1.93758	0.0526749
AC087190.1	0.67645	-0.61232	0.540326
AL513534.1	1.05005	0.116885	0.906951
AL031598.1	0.963825	-0.0642721	0.948754
AC136618.1	0.289282	-1.38826	0.165057
AC027702.1	0.39455	-1.31368	0.188953
AC068870.1	1.5033	0.878819	0.379499
AC007823.1	1.71475	1.1616	0.245396
AC010542.2	1.48329	0.911645	0.361955
LINC01963	0.619367	-0.905632	0.365131
AC109460.2	1.0767	0.305509	0.759978
AC106886.2	0.619976	-0.575739	0.564791
AL158212.3	1.25656	0.347584	0.728153
CAPN10-DT	1.74325	0.673924	0.500359
AC009021.2	1.65361	1.18598	0.235631
AC036103.1	1.38524	1.12735	0.259596
AL441883.1	1.7526	0.51927	0.603573
AP003469.4	1.20225	0.663035	0.507308
AC141586.3	1.01708	0.0218311	0.982583
LINC00563	0.863653	-0.244667	0.806714
AL162231.4	5.45296	3.05995	0.00221378
AC099518.4	2.62813	1.69907	0.0893056
AC013391.3	0.708947	-0.505109	0.613483
AC009065.7	0.736086	-0.389805	0.696681
AC109460.4	0.632567	-0.720603	0.471154
AL137782.1	1.15167	0.636869	0.52421
AC093525.6	1.11536	0.210465	0.833305
AL031600.3	0.673499	-0.846081	0.397508
AC093849.1	0.282974	-1.3656	0.172065
AL360270.2	1.0929	0.237262	0.812454
AC018362.1	1.04864	0.137655	0.890513
AC068724.1	0.808669	-0.554495	0.57924
AC027228.2	2.49751	1.34406	0.178928
AC113208.3	2.80027	1.69489	0.0900972
AC139530.1	1.43128	1.27907	0.200873
DKFZP434A062	0.341121	-1.26526	0.205777
AC020978.5	0.623676	-1.03872	0.298934
AC004494.1	1.3913	1.16254	0.245015
AC145207.2	0.745021	-0.939631	0.347407
AC007613.1	0.884044	-0.228723	0.819084
AC004771.4	0.561308	-1.3004	0.193463
MIR193BHG	1.09898	0.223817	0.8229
AC021224.1	1.84558	1.92351	0.0544156
AC145207.3	0.88414	-0.630202	0.528562
AC005921.2	0.709931	-0.630025	0.528678
AF001550.1	1.50707	0.833024	0.404831
AC090617.5	0.815476	-0.380307	0.703718
ZNF213-AS1	0.967526	-0.0422362	0.96631
AC040162.3	1.33625	0.54735	0.584139
AC127496.6	1.00958	0.0218342	0.98258
AF001548.2	1.14484	0.359381	0.71931
LINC00667	1.35088	0.964765	0.334663
AC025682.1	1.07277	0.287464	0.773757
AC018521.1	0.707681	-1.01614	0.309565
AP003396.5	1.62985	1.8849	0.0594435
AC087393.2	1.42392	1.22874	0.219168
AC018521.2	0.752206	-1.44353	0.148871
AC126365.1	1.95201	1.80471	0.0711206
AP001020.2	1.59012	0.973815	0.330148
SEPT4-AS1	4.96404	2.1759	0.029563
AC005725.1	1.04784	0.0560596	0.955294
AC009084.1	0.839637	-1.85085	0.0641913
DTX2P1-UPK3BP1-PMS2P11	0.547218	-0.893064	0.371823
AC129510.1	1.1896	0.315308	0.752528
AC004408.1	0.450624	-1.14594	0.251819
AC103809.1	1.33067	0.662814	0.50745
AP001020.3	0.982265	-0.0197061	0.984278
AC061975.6	1.68928	0.925224	0.354849
AC093330.1	0.532643	-1.29997	0.193611
LINC00663	1.48238	0.638075	0.523425
AC006213.1	0.837354	-0.425425	0.670527
AC067852.2	3.54801	1.24576	0.212852
AC023421.1	1.54864	0.624841	0.532075
AC011511.2	1.43992	1.08908	0.276118
AC018761.2	0.880531	-0.29399	0.768765
UXT-AS1	1.26046	0.579977	0.56193
TBC1D3P1-DHX40P1	0.887076	-0.29716	0.766345
AC011511.3	0.71177	-1.09662	0.272805
ZNF561-AS1	1.37104	0.386327	0.699255
CHMP1B-AS1	0.661355	-1.59156	0.111484
LINC01140	1.34348	0.721593	0.470544
CEBPA-DT	0.719943	-0.847405	0.396769
AC002398.2	0.849686	-0.356518	0.721453
DM1-AS	0.899055	-0.189376	0.849798
FAM215A	2.55095	1.7368	0.0824227
AC011511.5	1.4512	1.62081	0.105058
AC138430.1	0.879382	-0.244904	0.806531
LINC01482	0.332102	-1.27099	0.203732
AC022098.2	0.428865	-1.23249	0.217767
AC010300.1	1.09071	0.120905	0.903766
AC005785.1	0.902982	-0.377182	0.706038
AC010503.1	0.996574	-0.017162	0.986307
AC012313.3	0.686178	-1.35034	0.176908
AL031282.2	1.36292	0.590558	0.554816
AC012313.5	0.506956	-0.857248	0.391308
LINC01711	0.663993	-0.485728	0.62716
AC010336.5	0.991248	-0.025732	0.979471
AP001160.3	0.808229	-0.185051	0.853189
AC008894.2	0.684795	-1.47538	0.140111
AC093503.2	0.882493	-0.426329	0.669868
AC007292.2	0.832052	-0.25009	0.802517
AC008764.6	1.50799	0.823772	0.410069
AC020913.2	0.947144	-0.0751772	0.940074
AC011483.2	0.945098	-0.0813031	0.935201
AC016629.2	2.20323	2.65028	0.00804246
RPARP-AS1	2.98427	1.45431	0.145861
AC011479.3	1.2002	0.31729	0.751023
AC008760.1	1.28204	0.829604	0.406763
DDIT4-AS1	1.2791	2.16562	0.0303406
PCF11-AS1	1.15509	0.42753	0.668993
AC006064.4	1.16348	0.533368	0.593779
AL137247.1	0.850577	-0.619901	0.535323
AC087203.3	0.99274	-0.0131254	0.989528
AC027020.2	1.9046	0.961959	0.33607
AL158163.1	1.94161	0.878554	0.379643
AC096947.1	0.831447	-0.237293	0.812429
AL451085.2	0.929365	-0.319295	0.749503
AC103858.1	0.709883	-0.517465	0.604831
AL162258.1	1.03899	0.239984	0.810343
AL162258.2	0.982338	-0.0686791	0.945245
AL139423.1	2.08281	1.16684	0.243273
AL137127.1	1.09339	0.314742	0.752958
AC135507.1	1.03562	0.103048	0.917925
IER3-AS1	1.11051	0.984489	0.324875
AC005392.3	0.516118	-0.976473	0.32883
AL356056.3	0.880157	-0.27758	0.781335
U91328.2	1.18565	0.765079	0.444224
AC006027.1	0.764971	-0.514917	0.606611
AC021097.1	1.58951	1.73778	0.0822501
AC019069.1	1.01682	0.042792	0.965867
AC005696.2	0.805056	-0.826814	0.408342
AC004908.2	1.82797	1.64378	0.100221
AC018648.1	1.08324	0.319232	0.749551
Z94721.2	0.491696	-1.18372	0.236522
AC084036.1	0.834343	-0.384528	0.700587
AP000347.2	1.56476	0.550835	0.581746
FAM106A	1.03122	0.0886776	0.929338
DGCR9	0.462459	-1.27917	0.200839
AC012531.2	0.333202	-1.40534	0.15992
AC073869.3	1.06316	0.227563	0.819986
AL590385.2	0.690768	-0.813465	0.415951
AL022328.3	1.83486	1.49181	0.135748
AC010619.2	0.766705	-0.343627	0.731127
AL355816.2	0.817177	-0.561063	0.574755
AC092953.2	0.708607	-1.21478	0.22445
AC017083.2	0.67328	-0.799459	0.424024
DGCR11	0.82594	-0.345296	0.729872
AC128687.2	0.739296	-1.58467	0.113041
AC008738.7	0.845984	-0.594687	0.552053
AC112229.4	1.28495	0.873027	0.382648
AC104836.1	1.80117	0.740441	0.459032
AC009283.1	0.777007	-0.85891	0.39039
AL139260.2	0.985877	-0.0528779	0.957829
AL731566.1	1.12738	0.447553	0.654476
AC138649.1	0.912787	-0.278045	0.780978
AC245297.3	0.583592	-0.942482	0.345946
AC069281.2	0.840719	-0.251837	0.801167
AC022929.2	2.11633	1.34932	0.177235
AL355974.1	5.48406	2.03845	0.0415054
AC245060.5	0.981886	-0.0477838	0.961889
AC125257.2	1.64217	2.00566	0.0448928
AC131238.1	1.28001	0.793576	0.427442
AC254629.1	0.943545	-0.215373	0.829476
AC245884.11	0.600068	-0.806919	0.419713
AC012645.4	1.01211	0.0423284	0.966237
PTGER4P2-CDK2AP2P2	1.3659	0.508497	0.611105
AC009133.4	0.835228	-0.648068	0.516941
AL136379.1	0.392119	-1.21429	0.224637
AC009118.3	1.21331	0.603133	0.54642
AC010327.5	0.689822	-0.910309	0.36266
AC015922.3	0.756837	-1.36184	0.173248
AC008760.2	1.10366	0.975406	0.329359
AL589743.4	3.70822	1.52951	0.126139
AC084876.1	2.42104	2.58645	0.00969696
AL034550.2	0.661099	-0.879964	0.378879
AC159540.2	1.06659	0.233302	0.815527
AL138478.1	0.850413	-0.88009	0.37881
LUNAR1	1.62328	0.827438	0.407989
AL031320.2	0.713295	-1.58206	0.113635
AC243967.3	0.772627	-0.229528	0.818458
AL161645.1	0.727266	-0.570326	0.568457
AC073508.3	3.45524	2.04392	0.0409617
EPB41L4A-DT	1.29848	0.383501	0.701348
SND1-IT1	0.848773	-0.439139	0.660561
AC105052.4	1.04413	0.0720221	0.942584
LINC00216	1.35774	0.485111	0.627597
AL022311.1	1.48027	1.14234	0.253312
PLAC4	0.420413	-1.43078	0.152494
UCKL1-AS1	0.811876	-0.776705	0.437333
AL031595.3	0.667603	-0.76008	0.447207
CPS1-IT1	0.925157	-0.544618	0.586016
N4BP2L2-IT2	0.925959	-0.0888361	0.929212
FP671120.4	1.21347	2.03207	0.0421464
DBET	0.796576	-0.510981	0.609365
ERC2-IT1	0.279832	-1.46234	0.143648
AC106017.2	2.34274	1.08757	0.276785
Z82244.1	1.15954	0.216848	0.828326
LINC01002	0.58755	-0.725825	0.467946
AL162456.1	0.53108	-0.513728	0.607442
MGC4859	0.641647	-1.48381	0.137859
AC087521.4	1.3549	1.00711	0.31388
AL137002.2	0.907453	-0.511728	0.608842
AL512662.2	1.90594	0.882103	0.377721
AC079781.5	1.30234	2.71926	0.00654273
AC245033.4	2.71016	2.41541	0.0157173
AL662884.2	0.229003	-1.58339	0.113332
AC107959.4	0.844726	-0.284628	0.775929
AL138689.2	1.36098	1.37888	0.167931
AC090517.5	1.44556	1.01893	0.308236
AC091564.7	0.896695	-0.312945	0.754322
AC104162.2	0.788165	-0.671116	0.502146
GABPB1-IT1	1.25366	0.422276	0.672823
AC004900.1	0.959866	-0.111716	0.911049
AC017116.2	0.541939	-1.34329	0.179178
AL161665.1	1.11719	0.462538	0.643696
AL450992.2	1.60385	1.23774	0.215811
AP002433.2	0.544156	-2.9738	0.00294133
AC021723.2	0.876306	-0.43113	0.666374
BX890604.2	1.68613	1.27802	0.201243
AC098588.2	1.27829	0.371106	0.710558
AC005082.2	0.667846	-1.21047	0.2261
AC019257.7	1.20298	0.650591	0.515311
