# Supplementary material for: Identification of a novel four-lncRNA signature as a prognostic indicator in cirrhotic hepatocellular carcinoma
Source: PeerJ. 2019 Aug 1;7:e7413. doi: 10.7717/peerj.7413 (PMC6679908; doi:10.7717/peerj.7413)
Supplement: Table S5 — The established formula for the training set was used to calculate the patient risk score for the testing set. The same cutoff value used for the training set was also used to divide the testing set into high-risk (n = 44) and low-risk cohorts (n = 56). [file peerj-07-7413-s005.xlsx]

## Sheet: Sheet1
id	Recurr_months	Recurr_status	Survival_months	Survival_status	POLR2J4	AC093797.1	AL121748.1	AL162231.4	risk_score	risk
GSM362958	28.2	1	28.2	1	4.90751	7.15134	6.63742	3.36574	1.59891	High
GSM362971	40.4	1	48.1	1	4.67709	9.40989	5.33814	3.58429	0.570737	Low
GSM362972	66	0	66	0	5.28421	9.01759	5.62856	3.72683	0.374624	Low
GSM362978	28.8	1	28.8	1	4.63626	8.6677	6.11125	3.46868	1.05201	High
GSM362984	51.4	0	51.4	0	5.12624	8.07616	6.67444	3.32719	0.710844	Low
GSM362987	57.7	1	60.4	0	5.21924	8.09676	6.03241	3.41431	0.515212	Low
GSM362988	51.1	0	51.1	0	5.1716	6.92576	5.22702	3.12283	0.469633	Low
GSM362993	3.8	1	3.8	0	4.62496	8.62087	5.30636	3.23723	0.570413	Low
GSM362994	54.8	1	54.8	0	5.47132	8.49051	5.06346	3.3707	0.179411	Low
GSM363008	23.6	1	58.4	0	4.60229	8.3616	5.46818	3.82905	1.53633	High
GSM363016	2	0	2	0	4.90626	7.03408	6.87217	3.46407	2.13272	High
GSM363017	8.4	1	12.7	1	4.90199	6.62722	7.1736	3.6694	3.88229	High
GSM363030	4.5	1	4.5	1	4.65358	7.55583	5.44355	3.70633	1.77063	High
GSM363031	20.8	1	52.8	0	4.68217	8.12849	5.20311	3.97142	1.62689	High
GSM363032	24.9	0	24.9	0	4.74448	6.07687	6.03268	3.5497	3.3344	High
GSM363033	36	1	36.4	1	4.6484	6.37157	4.9839	3.93967	3.4802	High
GSM363039	52.8	0	52.8	0	5.26253	8.60216	5.95882	3.62688	0.481088	Low
GSM363048	20.3	1	20.3	1	4.76441	7.96165	4.8545	3.51178	0.739591	Low
GSM363052	14.3	1	14.3	1	4.53957	4.52129	6.27861	4.38619	31.4201	High
GSM363053	57	0	57	0	5.10806	8.63924	4.96183	3.63419	0.388697	Low
GSM363055	7.3	0	7.3	0	4.78265	6.99046	6.7272	3.64711	3.11806	High
GSM363056	19.2	1	19.2	1	4.85756	5.86244	6.51196	3.84282	5.605	High
GSM363057	22.8	1	60.5	1	4.7294	8.825	5.77636	3.54805	0.809028	Low
GSM363069	1.7	1	13.6	1	4.87164	8.16801	5.23768	3.63265	0.786839	Low
GSM363070	57	0	57	0	4.68728	6.29593	4.10916	3.60736	1.51051	High
GSM363073	21.8	1	26.5	1	4.806	5.68641	4.35875	5.2783	16.1559	High
GSM363074	57.7	0	57.7	0	4.39428	9.35822	6.06805	3.73403	1.50216	High
GSM363076	23	1	23	1	4.8395	4.89727	4.40754	6.03212	60.4292	High
GSM363079	5.2	1	7.8	1	4.72383	7.20228	5.91595	3.63189	2.11179	High
GSM363086	60.5	0	60.5	0	4.96531	8.33178	5.19121	3.50522	0.524719	Low
GSM363100	1.5	1	3.4	1	4.36532	7.54197	5.79231	3.47284	2.3845	High
GSM363101	56.3	0	56.3	0	4.371	8.78447	5.166	3.44367	0.949715	Low
GSM363104	29.9	1	35.9	1	4.98853	9.15598	5.60177	3.78617	0.585359	Low
GSM363108	48.8	0	48.8	0	4.95025	8.81119	4.34116	3.49548	0.289405	Low
GSM363121	51.2	0	51.2	0	4.57775	5.08426	5.97733	3.2074	4.35542	High
GSM363122	55.4	0	55.4	0	4.98291	8.87884	5.26584	3.17741	0.266232	Low
GSM363123	42.7	0	42.7	0	5.30484	8.02134	4.46103	3.34949	0.216099	Low
GSM363125	16.5	1	16.5	1	4.88721	6.92512	5.55757	3.11943	0.832887	Low
GSM363126	59.5	1	59.5	0	4.97207	8.08146	6.17239	4.135	2.02699	High
GSM363128	10	1	30.1	1	4.96326	5.6882	5.07563	3.58794	1.98833	High
GSM363129	3.2	1	3.5	1	4.56444	5.44038	4.89813	3.47299	3.27356	High
GSM363130	61.8	0	61.8	0	4.81642	9.79166	5.70519	3.35551	0.336767	Low
GSM363142	46.1	1	46.1	1	4.97928	7.10333	4.7946	3.63419	0.920163	Low
GSM363143	32.6	1	32.6	1	4.82167	7.93933	7.04593	3.23848	1.26658	High
GSM363147	28.7	1	28.7	1	5.12627	7.72864	6.06481	3.52884	0.832448	Low
GSM363148	11.8	1	52.4	0	4.81207	6.92522	4.49287	3.67407	1.19078	High
GSM363150	3.3	1	3.3	1	4.03254	4.30198	5.04841	3.46573	13.4388	High
GSM363168	53.8	0	53.8	0	5.07701	9.89789	5.43937	3.31882	0.182854	Low
GSM363169	39.4	0	39.4	0	5.0308	7.02785	5.47594	3.36068	0.838402	Low
GSM363172	6.7	1	6.7	1	4.63051	6.57935	5.37991	3.3789	1.87425	High
GSM363182	52.7	0	52.7	0	4.84089	8.29796	5.39144	3.38664	0.60412	Low
GSM363184	16.3	0	16.3	0	4.71879	6.24056	5.22701	3.12076	1.29511	High
GSM363186	7.6	1	7.6	1	5.21605	9.11247	5.03249	3.41817	0.205327	Low
GSM363188	46.3	1	57.3	0	4.90399	8.55432	5.61212	3.24386	0.445109	Low
GSM363192	52.2	0	52.2	0	5.18446	7.62695	5.67237	3.53234	0.67637	Low
GSM363196	51.1	1	57.7	0	5.26374	8.97242	4.65027	3.45613	0.181303	Low
GSM363200	23.9	1	23.9	1	4.52302	8.5466	4.4496	3.56857	0.724206	Low
GSM363202	6.7	1	60	0	5.17082	8.09177	4.52665	3.54519	0.338795	Low
GSM363207	53.3	1	53.3	1	4.89689	6.41817	5.14059	3.16855	0.928815	Low
GSM363211	8.9	1	8.9	1	4.74893	7.01304	5.49969	3.14296	0.989346	High
GSM363220	29.9	1	54.2	0	4.63875	8.43472	4.93897	3.20988	0.5018	Low
GSM363222	49.1	1	48.4	0	5.00798	5.96141	4.14362	3.22934	0.681618	Low
GSM363230	4.8	0	4.8	0	5.15182	8.02263	5.40318	3.49821	0.499308	Low
GSM363235	32.8	0	32.8	0	4.65857	6.65923	5.27141	3.10668	1.16147	High
GSM363237	4.7	1	57.5	0	4.81906	5.17891	5.78092	3.20363	2.63374	High
GSM363239	6.8	1	42.2	1	4.87738	6.1527	5.85383	3.60402	2.60429	High
GSM363249	59.2	0	59.2	0	4.67686	7.55255	5.63901	3.53879	1.50454	High
GSM363251	19.6	1	19.6	1	4.53305	8.57978	5.85331	3.17177	0.782425	Low
GSM363263	3	1	3	1	5.02133	5.66024	4.4984	3.92847	2.21636	High
GSM363264	17.8	1	17.8	1	5.18604	8.04997	4.59128	3.43971	0.303514	Low
GSM363266	1.5	1	2.5	1	4.97479	6.47101	5.41705	3.69037	1.77636	High
GSM363270	21.3	1	21.3	1	4.3739	9.62031	5.17197	3.41512	0.610946	Low
GSM363271	28.7	0	28.7	0	4.34034	6.41916	4.7631	3.37528	2.38518	High
GSM363272	56.3	0	56.3	0	5.24512	9.14096	4.9878	3.41281	0.188712	Low
GSM363274	26.9	1	26.9	1	4.88197	5.54277	5.50416	3.29655	2.00396	High
GSM363294	62.6	0	62.6	0	4.59276	7.23011	5.7264	3.34667	1.62115	High
GSM363295	54.9	0	54.9	0	4.79576	7.92451	5.43247	3.51038	0.924437	Low
GSM363296	27.5	1	27.5	1	4.7913	7.95381	5.23882	3.36412	0.698313	Low
GSM363297	3	0	3	0	4.46048	5.64397	4.82643	3.27115	2.59776	High
GSM363310	23.5	1	23.5	1	4.76309	8.18745	5.94768	3.42041	0.95662	Low
GSM363311	19	0	19	0	4.89157	8.39729	5.95547	3.45124	0.742796	Low
GSM363312	55.3	0	55.3	0	5.31359	8.55297	4.42967	4.06304	0.407102	Low
GSM363316	54.7	0	54.7	0	4.76644	7.70415	4.72623	3.31032	0.609006	Low
GSM363317	8	1	62.8	0	4.80326	4.66129	6.62906	3.54337	7.78117	High
GSM363326	37.2	0	37.2	1	4.55343	6.25844	4.76514	3.21953	1.52849	High
GSM363327	60.1	0	60.1	0	5.30542	8.43051	4.83728	3.54227	0.268018	Low
GSM363332	2.5	1	12.6	1	4.82346	7.64122	5.58808	3.4173	0.965477	Low
GSM363333	13.5	1	13.5	1	4.33092	7.89592	5.769	3.53996	2.28549	High
GSM363335	59.4	0	59.4	0	4.98013	8.83611	4.85545	3.8276	0.525106	Low
GSM363344	38.7	0	38.7	0	5.43119	8.08524	5.26742	3.19102	0.201315	Low
GSM363346	7.3	1	14.3	1	5.07046	6.41184	5.54106	3.46328	1.24716	High
GSM363354	10.4	1	10.4	1	4.79614	5.22073	6.36596	3.2234	3.54689	High
GSM363362	5.8	1	5.8	1	4.71501	6.59157	5.43608	3.31021	1.53823	High
GSM363364	10.2	1	27.1	1	5.00536	8.11801	6.43582	3.30976	0.736703	Low
GSM363366	52.3	0	52.3	0	5.49094	8.4462	4.08457	3.51239	0.13868	Low
GSM363368	11	1	15.4	1	4.57971	8.39837	4.28948	3.2377	0.434834	Low
GSM363371	66.3	0	66.3	0	5.06225	8.13637	4.4585	3.31028	0.280575	Low
GSM363391	21.5	1	57.3	0	4.97728	7.12754	4.23754	3.24188	0.431231	Low
GSM363400	19.1	1	55.6	0	4.61328	8.6416	5.09018	3.59505	0.827581	Low
GSM363404	12	1	12	1	5.25497	8.82329	4.45527	3.4495	0.179634	Low
