# Supplementary material for: Identification of a novel four-lncRNA signature as a prognostic indicator in cirrhotic hepatocellular carcinoma
Source: PeerJ. 2019 Aug 1;7:e7413. doi: 10.7717/peerj.7413 (PMC6679908; doi:10.7717/peerj.7413)
Supplement: Table S6 — The correlation between lncRNAs and protein-coding genes was analyzed. The significantly correlated protein-coding genes (Pearson coefficient > 0.4, P < 0.001) were used for GO analysis to determine the potential mechanism of the four lncRNAs in regulating HCC. [file peerj-07-7413-s006.xlsx]

## Sheet: Sheet1
ID	Description	GeneRatio	BgRatio	pvalue	p.adjust	qvalue	geneID	Count
GO:0048037	cofactor binding	97/1273	495/17632	6.11979e-20	6.25443e-17	5.23725e-17	2328/50865/64816/211/4913/4129/37/2329/32/56922/1565/54363/1428/3163/2639/4967/1577/5264/1610/217/23530/3273/374291/33/1491/51179/34/3155/4329/1408/847/48/23408/27232/2806/5447/3712/112399/25974/10993/1593/55316/9380/219/7172/2230/1558/3033/6821/51380/6652/2108/23410/84869/6715/4594/6188/7108/27034/5860/5352/9131/7498/2539/1576/64850/51084/1528/79001/2875/4723/1581/2110/57834/189/5095/6470/23042/…	97
GO:0050662	coenzyme binding	69/1273	285/17632	1.37646e-19	7.03369e-17	5.88978e-17	2328/211/4129/37/2329/32/56922/54363/1428/2639/4967/5264/1610/217/23530/33/1491/51179/34/3155/4329/1408/847/23408/27232/2806/5447/3712/112399/25974/10993/9380/219/7172/3033/6821/51380/6652/2108/23410/84869/6715/7108/27034/5860/5352/9131/7498/2539/64850/51084/2875/4723/2110/189/5095/6470/23042/55526/79777/18/55753/6898/10455/7923/102724560/2572/55289/27158	69
GO:0019842	vitamin binding	32/1273	139/17632	3.17562e-09	8.53561e-07	7.14744e-07	211/32/56922/173/23541/4967/5264/1491/27232/2806/112399/25974/10993/5950/51380/4594/5352/10841/64850/2875/189/5095/6470/23042/55526/18/55753/6898/102724560/2352/2572/1381	32
GO:0016614	oxidoreductase activity, acting on CH-OH group of donors	31/1273	132/17632	3.34075e-09	8.53561e-07	7.14744e-07	8630/224/3028/54363/1962/51179/3290/3295/9380/3032/3033/8608/6652/84869/873/2539/622/22977/51084/1528/79001/51181/130/4051/124/125/128/7923/126/2820/3284	31
GO:0016903	oxidoreductase activity, acting on the aldehyde or oxo group of donors	15/1273	44/17632	2.17044e-07	4.43638e-05	3.71488e-05	224/594/54363/4967/217/7915/4329/219/223/10840/501/55526/55753/128/593	15
GO:0016616	oxidoreductase activity, acting on the CH-OH group of donors, NAD or NADP as acceptor	26/1273	121/17632	3.99199e-07	6.7997e-05	5.69385e-05	8630/3028/1962/3290/3295/9380/3032/3033/8608/6652/84869/873/2539/622/22977/51084/1528/51181/130/124/125/128/7923/126/2820/3284	26
GO:0016829	lyase activity	33/1273	183/17632	8.8036e-07	0.000128533	0.000107629	4913/4258/5106/23417/1962/1491/3155/55268/48/262/5105/1892/3295/10993/229/3032/51380/4259/210/6188/8091/10841/64850/1632/6470/23042/55739/593/102724560/2572/2977/114/59344	33
GO:0001653	peptide receptor activity	29/1273	151/17632	1.05707e-06	0.000135041	0.000113079	10268/10267/2642/9340/4986/7434/1395/6869/3061/4159/2847/6754/4829/3062/3973/2840/64106/6870/9283/2358/10316/2829/186/3579/51289/8811/2826/4887/1241	29
GO:0008528	G protein-coupled peptide receptor activity	28/1273	145/17632	1.44012e-06	0.000163534	0.000136938	10268/10267/2642/9340/4986/7434/6869/3061/4159/2847/6754/4829/3062/3973/2840/64106/6870/9283/2358/10316/2829/186/3579/51289/8811/2826/4887/1241	28
GO:0050660	flavin adenine dinucleotide binding	19/1273	77/17632	1.61113e-06	0.000164658	0.000137879	2328/4129/37/2329/2639/1610/33/34/1408/5447/3712/25974/2108/27034/9131/7498/2110/55289/27158	19
GO:0008028	monocarboxylic acid transmembrane transporter activity	15/1273	53/17632	3.18072e-06	0.000295517	0.000247457	8647/10998/6554/10599/11309/11001/6567/6529/10991/23539/28965/6538/53919/9123/159963	15
GO:0042562	hormone binding	22/1273	104/17632	4.02255e-06	0.00031722	0.00026563	5315/1428/2690/2908/3953/7276/10267/5295/367/2642/9340/1137/7434/1395/1143/3061/4159/2847/3062/3973/186/8811	22
GO:0016878	acid-thiol ligase activity	11/1273	30/17632	4.03509e-06	0.00031722	0.00026563	2182/10998/2181/11001/2180/80221/8801/54988/123876/23205/28965	11
GO:0033218	amide binding	49/1273	348/17632	5.09921e-06	0.000372242	0.000311704	37/32/56922/10857/55353/2639/2690/10307/33/3953/3155/4329/27232/348/10267/25974/6653/1453/6715/5295/84134/10841/5824/929/8322/5095/79777/10455/2642/4481/9340/4986/1215/4099/7434/1395/2352/30819/3061/4159/2892/2847/6754/3062/9283/10316/186/8811/9883	49
GO:0005342	organic acid transmembrane transporter activity	28/1273	156/17632	6.36336e-06	0.000390215	0.000326753	8647/10998/6554/366/6510/206358/10599/11309/55089/6541/11001/10050/6567/6529/124565/1468/10991/55117/6561/5172/23539/28965/6533/6538/53919/9123/159963/9152	28
GO:0046943	carboxylic acid transmembrane transporter activity	28/1273	156/17632	6.36336e-06	0.000390215	0.000326753	8647/10998/6554/366/6510/206358/10599/11309/55089/6541/11001/10050/6567/6529/124565/1468/10991/55117/6561/5172/23539/28965/6533/6538/53919/9123/159963/9152	28
GO:0016405	CoA-ligase activity	10/1273	26/17632	6.76193e-06	0.000390215	0.000326753	2182/10998/2181/11001/2180/80221/54988/123876/23205/28965	10
GO:0015645	fatty acid ligase activity	9/1273	21/17632	6.87267e-06	0.000390215	0.000326753	2182/10998/2181/11001/2180/54988/123876/23205/28965	9
GO:0031406	carboxylic acid binding	32/1273	192/17632	7.29079e-06	0.000392168	0.000328389	1373/5009/32/56922/5264/3155/5105/27232/2806/112399/341/445/10247/9380/5352/10841/57834/80765/189/5095/6470/128/6898/4099/2352/2572/2169/8001/55289/23569/1381/2917	32
GO:0016645	oxidoreductase activity, acting on the CH-NH group of donors	10/1273	27/17632	1.00462e-05	0.000492603	0.000412489	10157/10797/645/4522/1428/10840/5860/2110/51268/54498	10
GO:0043177	organic acid binding	33/1273	204/17632	1.0122e-05	0.000492603	0.000412489	1373/5009/32/56922/5264/3155/5105/27232/2806/112399/341/445/10247/9380/5352/10841/57834/80765/189/5095/6470/128/6898/4099/2352/3050/2572/2169/8001/55289/23569/1381/2917	33
GO:0004467	long-chain fatty acid-CoA ligase activity	7/1273	13/17632	1.17179e-05	0.000544348	0.000455819	2182/10998/2181/11001/2180/23205/28965	7
GO:0016877	ligase activity, forming carbon-sulfur bonds	12/1273	40/17632	1.59268e-05	0.000707703	0.000592607	2182/10998/2181/10054/11001/2180/80221/8801/54988/123876/23205/28965	12
GO:0030170	pyridoxal phosphate binding	14/1273	54/17632	2.04147e-05	0.000834551	0.000698826	211/1491/2806/10993/51380/64850/2875/189/6470/23042/18/6898/102724560/2572	14
GO:0070279	vitamin B6 binding	14/1273	54/17632	2.04147e-05	0.000834551	0.000698826	211/1491/2806/10993/51380/64850/2875/189/6470/23042/18/6898/102724560/2572	14
GO:0004029	aldehyde dehydrogenase (NAD) activity	7/1273	14/17632	2.1972e-05	0.000863668	0.000723208	224/217/219/223/10840/501/128	7
GO:0015081	sodium ion transmembrane transporter activity	26/1273	150/17632	2.53952e-05	0.000961255	0.000804924	9497/483/8647/6554/10050/9154/6529/6580/84679/55117/6561/610/6523/495/6549/6533/6538/6326/6332/159963/9152/6338/2897/6336/496/283652	26
GO:0046873	metal ion transmembrane transporter activity	56/1273	444/17632	3.07139e-05	0.00112106	0.000938736	9497/483/490/8647/6554/7036/3764/10050/9154/6529/6580/475/6833/10368/84679/492/57113/55117/27039/6561/610/6523/8989/495/3769/6549/30819/6533/6538/4308/3351/6326/6332/7225/3756/3782/159963/775/776/3772/3760/29986/9152/784/6338/2897/3766/26251/3753/9312/56660/6336/22821/496/283652/777	56
GO:0050661	NADP binding	13/1273	50/17632	3.88342e-05	0.00136857	0.001146	2328/2329/1428/23530/847/5447/9380/84869/6715/7108/5860/2539/27158	13
GO:1901618	organic hydroxy compound transmembrane transporter activity	12/1273	44/17632	4.59065e-05	0.00155557	0.00130258	8647/6554/366/10227/10599/11309/5950/6580/23539/53919/9123/159963	12
GO:0016627	oxidoreductase activity, acting on the CH-CH group of donors	14/1273	58/17632	4.85971e-05	0.00155557	0.00130258	54884/37/645/2639/33/55825/34/3712/55316/6715/7108/27034/26063/55289	14
GO:0017046	peptide hormone binding	13/1273	51/17632	4.87066e-05	0.00155557	0.00130258	2690/3953/10267/5295/2642/9340/7434/1395/3061/4159/3062/186/8811	13
GO:0046906	tetrapyrrole binding	24/1273	141/17632	6.91955e-05	0.00214296	0.00179445	50865/64816/1565/3163/1577/3273/847/25974/1593/1558/6821/4594/1576/1528/1581/57834/4051/1579/1553/102724560/79747/3050/2977/11283	24
GO:0005506	iron ion binding	25/1273	152/17632	8.78522e-05	0.00258419	0.00216392	64816/1565/1577/5264/112399/1036/1593/2230/1558/5352/7498/1576/23498/1581/10826/57834/4051/1579/1553/7166/83475/3050/59344/242/11283	25
GO:0003995	acyl-CoA dehydrogenase activity	6/1273	12/17632	8.84997e-05	0.00258419	0.00216392	37/2639/33/34/3712/27034	6
GO:0008514	organic anion transmembrane transporter activity	31/1273	209/17632	0.000101326	0.00287654	0.00240872	9497/8647/10998/6554/366/6510/10227/206358/10599/11309/55089/6541/11001/10050/6567/6529/124565/1468/10991/55117/6561/5172/23539/28965/6533/6538/53919/9123/159963/9152/284439	31
GO:0008509	anion transmembrane transporter activity	43/1273	330/17632	0.000119285	0.00329484	0.00275899	9497/8647/10998/368/6554/366/6510/10227/206358/55107/10599/11309/2542/55089/6541/11001/10050/6567/6529/124565/6580/1468/10991/1192/22802/55117/6561/5172/23539/2570/2566/28965/6533/6538/11095/53919/9123/8001/2561/159963/9152/2562/284439	43
GO:0016620	oxidoreductase activity, acting on the aldehyde or oxo group of donors, NAD or NADP as acceptor	10/1273	35/17632	0.000128385	0.00345289	0.00289134	224/4967/217/7915/4329/219/223/10840/501/128	10
GO:0016646	oxidoreductase activity, acting on the CH-NH group of donors, NAD or NADP as acceptor	7/1273	18/17632	0.00015753	0.0041281	0.00345674	10157/10797/645/4522/1428/10840/5860	7
GO:0020037	heme binding	22/1273	131/17632	0.000167063	0.00426846	0.00357427	50865/64816/1565/3163/1577/3273/847/1593/1558/6821/1576/1528/1581/57834/4051/1579/1553/102724560/79747/3050/2977/11283	22
GO:0008188	neuropeptide receptor activity	12/1273	50/17632	0.000176484	0.00432179	0.00361893	6869/2847/6754/4829/3062/64106/6870/10316/51289/8811/4887/1241	12
GO:0009055	electron transfer activity	20/1273	114/17632	0.000177608	0.00432179	0.00361893	7384/8630/4129/217/10975/5447/2230/8608/2108/6715/5860/7498/22977/23498/27089/1528/2110/128/1352/1339	20
GO:0016835	carbon-oxygen lyase activity	15/1273	74/17632	0.000221193	0.0052572	0.00440221	4913/1962/55268/48/1892/3295/10993/3032/210/6188/8091/64850/1632/55739/102724560	15
GO:0015276	ligand-gated ion channel activity	23/1273	144/17632	0.000258192	0.00586383	0.00491018	3764/6833/1258/610/1137/8989/2570/2566/3769/1143/2892/1261/8001/2561/2895/3772/3760/2562/3359/6338/2897/3766/22821	23
GO:0022834	ligand-gated channel activity	23/1273	144/17632	0.000258192	0.00586383	0.00491018	3764/6833/1258/610/1137/8989/2570/2566/3769/1143/2892/1261/8001/2561/2895/3772/3760/2562/3359/6338/2897/3766/22821	23
GO:0031957	very long-chain fatty acid-CoA ligase activity	5/1273	10/17632	0.000360684	0.00801346	0.00671021	2182/10998/11001/23205/28965	5
GO:0022804	active transmembrane transporter activity	43/1273	348/17632	0.000384436	0.00835943	0.00699991	9497/483/490/8647/368/6554/6510/206358/10599/11309/2542/55089/10351/55244/10050/6567/23460/9154/6529/6580/1468/10991/6833/10347/84679/492/55117/6561/5172/23539/6523/495/50617/6549/6533/6538/53919/9123/26154/159963/9152/496/283652	43
GO:0051287	NAD binding	12/1273	55/17632	0.000456097	0.00971107	0.00813173	217/23530/23408/9380/219/3033/6652/23410/5860/51084/4723/7923	12
GO:0008483	transaminase activity	7/1273	21/17632	0.000474983	0.00990679	0.00829562	2806/275/64850/2875/189/18/6898	7
GO:0022839	ion gated channel activity	42/1273	342/17632	0.000507588	0.0103751	0.00868777	3764/55107/1192/6833/10368/22802/1258/610/1137/8989/2570/2566/3769/1143/30819/2892/3351/6326/6332/3756/3782/1261/8001/2561/775/2895/776/3772/3760/2562/3359/784/6338/2897/3766/26251/3753/9312/56660/6336/22821/777	42
GO:0015077	monovalent inorganic cation transmembrane transporter activity	46/1273	387/17632	0.00057957	0.0116141	0.0097253	9497/483/8647/6554/23530/3764/206358/55244/10050/9154/6529/1528/6580/6833/1352/84679/55117/6561/610/6523/495/50617/3769/6549/30819/6533/6538/6326/6332/3756/3782/159963/1339/3772/3760/9152/6338/2897/3766/26251/3753/9312/56660/6336/496/283652	46
GO:0004497	monooxygenase activity	17/1273	98/17632	0.000604921	0.011889	0.00995549	2328/64816/2329/1565/1577/1593/1558/1576/1581/10826/57834/4051/1579/1553/7166/83475/11283	17
GO:1901681	sulfur compound binding	32/1273	242/17632	0.00065242	0.0123687	0.0103571	37/32/56922/2160/9388/2639/4967/1842/9037/3827/3273/33/3155/462/4329/27232/348/25974/7172/5095/55526/79777/55753/10455/8829/333/11095/2660/5727/1305/1991/80739	32
GO:0000062	fatty-acyl-CoA binding	7/1273	22/17632	0.000653531	0.0123687	0.0103571	37/2639/33/3155/4329/79777/10455	7
GO:0015267	channel activity	53/1273	467/17632	0.000700007	0.0130074	0.010892	366/3764/55107/84134/2705/1192/6833/10368/22802/57113/1258/27039/610/1137/8989/2570/2566/3769/1143/30819/2703/2892/4308/3351/6326/6332/7225/3756/3782/1261/8001/2561/775/2895/776/3772/362/3760/2562/3359/784/6338/2897/361/3766/26251/3753/9312/56660/6336/22821/283652/777	53
GO:0015291	secondary active transmembrane transporter activity	30/1273	223/17632	0.000713134	0.0130147	0.0108981	9497/6554/6510/206358/10599/11309/2542/55089/55244/10050/6567/9154/6529/6580/1468/10991/84679/55117/6561/5172/23539/6523/6549/6533/6538/53919/9123/159963/9152/283652	30
GO:0022803	passive transmembrane transporter activity	53/1273	468/17632	0.000735606	0.0131893	0.0110443	366/3764/55107/84134/2705/1192/6833/10368/22802/57113/1258/27039/610/1137/8989/2570/2566/3769/1143/30819/2703/2892/4308/3351/6326/6332/7225/3756/3782/1261/8001/2561/775/2895/776/3772/362/3760/2562/3359/784/6338/2897/361/3766/26251/3753/9312/56660/6336/22821/283652/777	53
GO:0005343	organic acid:sodium symporter activity	8/1273	29/17632	0.000787224	0.0138714	0.0116155	6554/6529/55117/6561/6533/6538/159963/9152	8
GO:0022836	gated channel activity	42/1273	351/17632	0.000860981	0.0149139	0.0124884	3764/55107/1192/6833/10368/22802/1258/610/1137/8989/2570/2566/3769/1143/30819/2892/3351/6326/6332/3756/3782/1261/8001/2561/775/2895/776/3772/3760/2562/3359/784/6338/2897/3766/26251/3753/9312/56660/6336/22821/777	42
GO:0016769	transferase activity, transferring nitrogenous groups	7/1273	23/17632	0.000881385	0.0149214	0.0124947	2806/275/64850/2875/189/18/6898	7
GO:0016597	amino acid binding	12/1273	59/17632	0.000890612	0.0149214	0.0124947	1373/5009/27232/2806/445/189/6470/6898/2572/8001/23569/2917	12
GO:0005261	cation channel activity	39/1273	320/17632	0.000914666	0.0150772	0.0126252	3764/55107/6833/10368/57113/1258/27039/610/1137/8989/3769/1143/30819/2892/4308/3351/6326/6332/7225/3756/3782/1261/775/776/3772/3760/3359/784/6338/2897/3766/26251/3753/9312/56660/6336/22821/283652/777	39
GO:0022838	substrate-specific channel activity	50/1273	442/17632	0.00104987	0.0170312	0.0142614	366/3764/55107/1192/6833/10368/22802/57113/1258/27039/610/1137/8989/2570/2566/3769/1143/30819/2892/4308/3351/6326/6332/7225/3756/3782/1261/8001/2561/775/2895/776/3772/362/3760/2562/3359/784/6338/2897/361/3766/26251/3753/9312/56660/6336/22821/283652/777	50
GO:0016830	carbon-carbon lyase activity	11/1273	53/17632	0.00121101	0.0193383	0.0161933	5106/23417/3155/262/5105/229/51380/6470/23042/593/2572	11
GO:0016705	oxidoreductase activity, acting on paired donors, with incorporation or reduction of molecular oxygen	23/1273	161/17632	0.00127526	0.020051	0.0167901	2328/64816/2329/1565/3163/1577/5264/5447/112399/1593/1558/5352/1576/1581/10826/57834/4051/1579/1553/7166/83475/11283/57604	23
GO:0015293	symporter activity	21/1273	142/17632	0.00130752	0.0202467	0.0169539	9497/6554/6510/206358/55089/10050/6567/9154/6529/6580/10991/55117/6561/23539/6523/6533/6538/9123/159963/9152/283652	21
GO:0099094	ligand-gated cation channel activity	17/1273	106/17632	0.00149747	0.0228421	0.0191272	3764/6833/1258/610/1137/8989/3769/1143/2892/1261/3772/3760/3359/6338/2897/3766/22821	17
GO:0016863	intramolecular oxidoreductase activity, transposing C=C bonds	5/1273	13/17632	0.00153348	0.0230473	0.019299	1891/1962/1632/10455/3284	5
GO:0015370	solute:sodium symporter activity	13/1273	72/17632	0.00176277	0.0261095	0.0218632	9497/6554/10050/9154/6529/6580/55117/6561/6523/6533/6538/159963/9152	13
GO:0030594	neurotransmitter receptor activity	18/1273	117/17632	0.00179229	0.0261674	0.0219117	153/1815/1137/2570/2566/1143/2892/59340/3351/8001/2561/3363/2895/3360/2562/3359/2897/1129	18
GO:0016836	hydro-lyase activity	11/1273	57/17632	0.00224932	0.0318618	0.02668	1962/55268/48/1892/3295/10993/3032/210/1632/55739/102724560	11
GO:0001618	virus receptor activity	13/1273	74/17632	0.00227584	0.0318618	0.02668	3383/6554/6510/50848/3921/983/3694/6504/2838/2993/1378/4340/3690	13
GO:0104005	hijacked molecular function	13/1273	74/17632	0.00227584	0.0318618	0.02668	3383/6554/6510/50848/3921/983/3694/6504/2838/2993/1378/4340/3690	13
GO:0005216	ion channel activity	47/1273	427/17632	0.00253467	0.0350059	0.0293128	3764/55107/1192/6833/10368/22802/57113/1258/27039/610/1137/8989/2570/2566/3769/1143/30819/2892/4308/3351/6326/6332/7225/3756/3782/1261/8001/2561/775/2895/776/3772/3760/2562/3359/784/6338/2897/3766/26251/3753/9312/56660/6336/22821/283652/777	47
GO:0005179	hormone activity	18/1273	121/17632	0.00262229	0.0357331	0.0299217	7276/3626/56729/6013/4852/1908/2797/1907/7425/2056/2689/3060/4880/5617/10022/797/1444/3630	18
GO:0005242	inward rectifier potassium channel activity	6/1273	21/17632	0.00295675	0.0392442	0.0328618	3764/6833/3769/3772/3760/3766	6
GO:0019200	carbohydrate kinase activity	6/1273	21/17632	0.00295675	0.0392442	0.0328618	3795/5207/3099/10020/55277/64080	6
GO:0004222	metalloendopeptidase activity	17/1273	113/17632	0.0030156	0.0395121	0.0330862	7384/4318/6868/8754/164656/4321/53616/64386/22802/11174/8756/2515/4317/11095/64066/4314/4325	17
GO:1901567	fatty acid derivative binding	7/1273	28/17632	0.00309802	0.0399764	0.0334749	37/2639/33/3155/4329/79777/10455	7
GO:0010181	FMN binding	5/1273	15/17632	0.00316838	0.0399764	0.0334749	54363/51179/5447/4723/27158	5
GO:0030553	cGMP binding	5/1273	15/17632	0.00316838	0.0399764	0.0334749	1258/5146/5593/5149/1261	5
GO:0016831	carboxy-lyase activity	8/1273	36/17632	0.00353544	0.0435327	0.0364529	5106/23417/262/5105/51380/23042/593/2572	8
GO:0030551	cyclic nucleotide binding	8/1273	36/17632	0.00353544	0.0435327	0.0364529	9693/5141/1258/5146/610/5593/5149/1261	8
GO:0070330	aromatase activity	6/1273	22/17632	0.00382046	0.0464823	0.0389228	64816/1565/1577/1558/1553/11283	6
GO:0022824	transmitter-gated ion channel activity	11/1273	61/17632	0.00391405	0.0465135	0.0389489	1137/2570/2566/1143/2892/8001/2561/2895/2562/3359/2897	11
GO:0022835	transmitter-gated channel activity	11/1273	61/17632	0.00391405	0.0465135	0.0389489	1137/2570/2566/1143/2892/8001/2561/2895/2562/3359/2897	11
GO:0003680	AT DNA binding	4/1273	10/17632	0.00398912	0.0468607	0.0392396	8091/5456/4297/3184	4
GO:0016741	transferase activity, transferring one-carbon groups	28/1273	228/17632	0.00405871	0.0471364	0.0394705	1373/5009/2146/7468/27232/2593/23743/10400/7172/10840/275/635/10841/8623/4255/6470/10196/25840/56981/84444/79066/63976/56979/8085/438/55251/57604/4297	28
GO:0015125	bile acid transmembrane transporter activity	5/1273	16/17632	0.00433749	0.049808	0.0417076	8647/6554/10599/11309/53919	5
