# Supplementary material for: Identification of a novel four-lncRNA signature as a prognostic indicator in cirrhotic hepatocellular carcinoma
Source: PeerJ. 2019 Aug 1;7:e7413. doi: 10.7717/peerj.7413 (PMC6679908; doi:10.7717/peerj.7413)
Supplement: Table S7 — The correlation between lncRNAs and protein-coding genes was analyzed. The significantly correlated protein-coding genes (Pearson coefficient > 0.4, P < 0.001) were used for KEGG enrichment analysis. [file peerj-07-7413-s007.xlsx]

## Sheet: Sheet1
ID	Description	GeneRatio	BgRatio	pvalue	p.adjust	qvalue	geneID	Count
hsa00071	Fatty acid degradation	27/733	44/7840	1.52651e-17	4.61005e-15	3.93678e-15	2182/224/37/2639/217/1962/33/34/2181/1892/219/3032/3033/223/2180/1376/501/10449/1632/130/1579/124/125/128/10455/126/23205	27
hsa00280	Valine, leucine and isoleucine degradation	23/733	48/7840	4.9361e-12	7.45351e-10	6.36497e-10	224/3028/56922/594/217/1962/34/3155/4329/1892/3712/3158/219/3032/3033/223/4594/27034/501/10449/5095/18/593	23
hsa04146	Peroxisome	27/733	83/7840	3.24503e-09	3.26666e-07	2.78958e-07	2182/1384/54363/23417/1891/5264/1610/1962/55825/51179/3155/2053/847/2181/3295/570/11001/6647/2180/7498/5824/189/5827/51268/373156/10455/26063	27
hsa04080	Neuroactive ligand-receptor interaction	64/733	338/7840	2.04003e-08	1.54022e-06	1.31528e-06	2690/2908/3827/3953/2642/153/5733/9340/1815/4986/1137/7434/1395/6013/2798/2570/2566/6869/1143/3061/4852/4159/1908/2914/2892/2797/1907/2847/6754/59340/4544/3351/4829/2689/3062/3973/8001/2561/3363/64106/2895/5731/3060/3360/2562/5729/6870/5028/147/2358/2897/10316/5617/10022/797/2918/186/1129/51289/8811/4887/155/2917/1241	64
hsa00410	beta-Alanine metabolism	14/733	31/7840	2.01966e-07	1.07231e-05	9.15702e-06	224/51733/23417/217/1962/34/4329/1892/219/223/501/18/54498/2572	14
hsa00260	Glycine, serine and threonine metabolism	16/733	40/7840	2.13041e-07	1.07231e-05	9.15702e-06	211/4129/1610/1491/27232/2593/10993/9380/275/635/501/189/6470/51268/4128/102724560	16
hsa00380	Tryptophan metabolism	16/733	42/7840	4.71779e-07	2.03539e-05	1.73813e-05	4129/224/2639/217/1962/847/1892/219/3033/223/23498/501/55526/4128/7166/438	16
hsa00310	Lysine degradation	19/733	59/7840	8.43851e-07	3.18554e-05	2.72031e-05	10157/224/2639/2146/7468/217/1962/1892/219/3033/223/5352/501/51268/55526/84444/56979/8085/4297	19
hsa01200	Carbon metabolism	28/733	116/7840	1.87385e-06	6.28781e-05	5.36952e-05	1373/5315/54363/4967/1962/51179/34/4329/847/48/2806/1892/9104/10993/229/275/4594/3099/2539/2203/2875/8801/189/5095/6470/55753/128/221823	28
hsa03320	PPAR signaling pathway	21/733	74/7840	2.32213e-06	7.01285e-05	5.98866e-05	2182/10998/5106/345/1962/33/34/2181/5105/3158/1593/11001/2180/1376/51129/1581/1579/6257/23205/28965/2169	21
hsa00350	Tyrosine metabolism	13/733	36/7840	1.13261e-05	0.000310952	0.00026554	4129/2954/2184/3081/2806/3242/130/124/4128/125/128/6898/126	13
hsa00640	Propanoate metabolism	12/733	32/7840	1.58271e-05	0.000398316	0.000340144	32/594/23417/1962/34/4329/1892/4594/8801/5095/18/593	12
hsa00650	Butanoate metabolism	11/733	28/7840	2.14736e-05	0.000498848	0.000425994	7915/1962/3155/1892/3158/3033/622/18/54988/123876/2572	11
hsa05204	Chemical carcinogenesis	20/733	82/7840	4.68328e-05	0.00101025	0.000862709	64816/4258/6822/1577/3290/1558/4259/2052/10/873/1576/130/124/125/7366/6799/373156/1553/128/126	20
hsa00010	Glycolysis / Gluconeogenesis	17/733	68/7840	0.000123561	0.0024877	0.00212438	5315/224/5106/217/5105/2538/229/219/223/3099/501/2203/130/124/125/128/126	17
hsa00620	Pyruvate metabolism	12/733	39/7840	0.000148317	0.00279949	0.00239064	3029/5315/224/32/5106/217/5105/9380/219/223/501/98	12
hsa00980	Metabolism of xenobiotics by cytochrome P450	18/733	76/7840	0.000166308	0.00295441	0.00252294	4258/1565/6822/1577/3290/4259/2052/873/1576/22977/130/124/125/7366/373156/1553/128/126	18
hsa00630	Glyoxylate and dicarboxylate metabolism	10/733	30/7840	0.000254215	0.00394063	0.00336513	54363/51179/847/48/9380/275/4594/189/5095/6470	10
hsa01212	Fatty acid metabolism	14/733	53/7840	0.00026018	0.00394063	0.00336513	2182/37/1962/33/34/2181/1892/3295/3032/3033/2180/1376/10449/23205	14
hsa00982	Drug metabolism - cytochrome P450	17/733	72/7840	0.000260969	0.00394063	0.00336513	2328/4129/2329/4258/1565/1577/1558/4259/1576/130/124/4128/125/7366/373156/128/126	17
hsa00330	Arginine and proline metabolism	13/733	50/7840	0.000507039	0.00729171	0.0062268	4129/224/1610/217/262/2806/2593/219/223/501/4128/54498/1158	13
hsa00340	Histidine metabolism	8/733	23/7840	0.000770429	0.0105747	0.00903037	4129/224/217/219/223/10841/501/4128	8
hsa04976	Bile secretion	16/733	72/7840	0.000805361	0.0105747	0.00903037	483/8647/10998/6554/366/6822/10599/570/2052/1576/1581/6580/6523/114/5568/361	16
hsa04920	Adipocytokine signaling pathway	15/733	69/7840	0.00147307	0.0185362	0.0158291	2182/32/5106/51422/10891/3953/2181/5105/2538/2180/6257/23205/208/4852/9021	15
hsa04973	Carbohydrate digestion and absorption	11/733	44/7840	0.00191013	0.0230744	0.0197045	483/2538/2542/5295/3099/276/6523/208/3938/776/346562	11
hsa04610	Complement and coagulation cascades	16/733	79/7840	0.00227317	0.0264038	0.0225477	10747/732/729/1361/2160/3827/462/5648/2161/2165/710/731/3818/5345/2157/1378	16
hsa04930	Type II diabetes mellitus	11/733	46/7840	0.00279642	0.0312785	0.0267105	5315/8835/5295/3099/6833/3651/775/776/9021/777/3630	11
hsa00830	Retinol metabolism	14/733	67/7840	0.0030967	0.0334001	0.0285222	8630/54884/1577/1558/8608/1576/130/1579/317749/124/125/7366/128/126	14
hsa00360	Phenylalanine metabolism	6/733	17/7840	0.00328806	0.0342412	0.0292405	4129/2806/10249/3242/4128/6898	6
hsa00250	Alanine, aspartate and glutamate metabolism	9/733	35/7840	0.00395607	0.0398245	0.0340084	1373/7915/56954/2806/445/2875/189/18/2572	9
hsa00061	Fatty acid biosynthesis	5/733	13/7840	0.00479236	0.0466868	0.0398685	2182/32/2181/2180/23205	5
